# Supplementary material for: Measuring within-day cognitive performance using the experience sampling method: A pilot study in a healthy population
Source: PLoS One. 2019 Dec 12;14(12):e0226409. doi: 10.1371/journal.pone.0226409 (PMC6907820; doi:10.1371/journal.pone.0226409)
Supplement: S1 Dataset — (XLS) [file pone.0226409.s005.xls]

## Sheet: Sheet1
Subject ID	Gender	Age	ESM replication	Day number	Hour	Total observations	Negative affect	Down	Insecure	Irritated	Lonely	Anxious	Guilty	Positive affect	Cheerful	Energetic	Satisfied	Enthusiastic	Worried	Tiredness	Company	Location	Activity-related stress	Focus	Distraction	Number of trials	% correctly answered trials
1	1	62	1	1	8	38	1.5	2	2	2	1	1	1	5.2	6	6	5	4	2	2	0	0	2333333	6	1	8	87.5
1	1	62	2	1	9	38	1	1	1	1	1	1	1	5.6	6	5	5	5	4	2	0	1	1666667	5	1	8	87.5
1	1	62	3	1	13	38	1	1	1	1	1	1	1	5	5	6	6	4	2	1	1	1	2333333	6	1	9	100
1	1	62	4	1	16	38	1	1	1	1	1	1	1	3.8	5	5	1	4	5	3	1	1	2	5	1	9	100
1	1	62	5	1	19	38	1	1	1	1	1	1	1	3.6	4	4	5	1	2	3	0	1	2666667	5	2	9	100
1	1	62	6	1	20	38	1	1	1	1	1	1	1	4.2	4	4	5	4	2	2	1	0	2333333	5		7	85.7
1	1	62	7	1	20	38	1	1	1	1	1	1	1	4.8	5	5	5	5	3	2	0	0	2	6	1	9	77.8
1	1	62	8	2	9	38	1	1	1	1	1	1	1	5.2	6	6	5	4	3	1	0	0	1333333	6	1	8	100
1	1	62	9	2	10	38	1	1	1	1	1	1	1	4.8	5	5	5	4	3	1	0	0	1666667	7	1	8	100
1	1	62	10	2	11	38	1.83333	1	6	1	1	1	1	4.8	5	5	5	4	3	3	1	0	2333333	6	1	9	100
1	1	62	11	2	13	38	1	1	1	1	1	1	1	4.6	5	5	5	4	3	1	1	1	2666667	6	2	9	100
1	1	62	12	2	16	38	1	1	1	1	1	1	1	4.8	5	5	6	4	3	1	0	0	2333333	6	1	9	100
1	1	62	13	2	18	38	1	1	1	1	1	1	1	4.4	4	5	5	4	3	2	1	0	2333333	6	1	8	87.5
1	1	62	14	2	19	38	1	1	1	1	1	1	1	4.2	4	4	5	4	2	1	1	0	1666667	6	1	9	100
1	1	62	15	2	22	38	1.33333	2	1	2	1	1	1	4.2	3	4	5	4	3	4	0	0	2	6	1	9	100
1	1	62	16	3	7	38	1.83333	1	1	5	1	1	2	2.2	1	2	4	2	2	4	1	0	1666667	4	2	8	87.5
1	1	62	17	3	11	38	1.16667	1	1	2	1	1	1	4.6	4	4	5	5	3	4	1	0	2	6	1	8	100
1	1	62	18	3	12	38	1	1	1	1	1	1	1	5.2	5	5	5	6	3	2	1	0	2333333	7	1	9	88.9
1	1	62	19	3	13	38	1.33333	1	1	2	1	1	2	5	5	5	5	5	3	2	1	0	1666667	6	1	8	100
1	1	62	20	3	18	38	1	1	1	1	1	1	1	4	4	5	4	4	2	4	1	0	2333333	6	2	9	100
1	1	62	21	3	20	38	2	2	4	2	2	1	1	4.2	4	4	5	4	3	4	1	0	1666667	7	2	9	88.9
1	1	62	22	3	20	38	1	1	1	1	1	1	1	4.2	4	4	5	4	3	5	1	0	1333333	6	1	8	87.5
1	1	62	23	4	8	38	1.16667	1	1	1	2	1	1	4.6	5	4	5	4	3	3	1	0	1666667	6	1	8	87.5
1	1	62	24	4	9	38	1	1	1	1	1	1	1	5	5	5	5	5	2	1	1	0	1333333	6	1	9	88.9
1	1	62	25	4	12	38	1	1	1	1	1	1	1	4.8	5	5	5	4	2	1	1	0	1666667	6	1	9	100
1	1	62	26	4	13	38	1	1	1	1	1	1	1	4.6	5	5	5	4	2	2	1	0	1666667	2	1	9	100
1	1	62	27	4	18	38	1.16667	1	1	1	1	1	2	4.2	4	4	5	4	2	4	1	0	1666667	6		10	80
1	1	62	28	4	18	38	1	1	1	1	1	1	1	5	5	6	5	4	3	3	1	0	2666667	5	1	9	100
1	1	62	29	4	19	38	1	1	1	1	1	1	1	4.8	5	5	5	4	2	4	1	0	1333333	6		8	100
1	1	62	30	5	11	38	1	1	1	1	1	1	1	5	6	5	5	4	3	4	1	0	1666667	6	1	9	100
1	1	62	31	5	14	38	1	1	1	1	1	1	1	4.8	5	5	5	4	3	4	0	0	2333333	6	1	8	100
1	1	62	32	5	16	38	1.16667	1	1	2	1	1	1	4.4	5	4	5	4	3	4	0	0	4	6	1	9	88.9
1	1	62	33	5	17	38	1.16667	1	1	2	1	1	1	4.6	5	5	5	4	3	4	1	0	1666667	6	1	9	100
1	1	62	34	5	19	38	1.33333	1	1	3	1	1	1	4.8	5	5	5	4	3	4	0	0	1333333	6	1	10	100
1	1	62	35	6	11	38	1	1	1	1	1	1	1	4.8	5	5	5	4	3	3	1	1	2666667	5	1	9	100
1	1	62	36	6	22	38	1.16667	1	1	2	1	1	1	4.4	5	4	5	4	3	4	1	0	1666667	5
1	1	62	37	6	22	38	1.16667	1	1	2	1	1	1	4.6	5	5	5	4	2	4	1	0	1333333	6		10	100
1	1	62	38	6	22	38	1	1	1	1	1	1	1	4.8	5	5	5	4	3	4	0	1	2333333	6	1	10	100
2	1	23	1	1	11	32	3.83333	6	2	7	4	3	1	2	2	2	3	2	5	6	0	0	4	2	2	9	100
2	1	23	2	1	14	32	2	2	1	1	4	3	1	3.6	4	3	5	3	1	2	0	0	1333333	6	1	9	88.9
2	1	23	3	1	18	32	3.66667	5	4	5	4	2	2	2.4	2	2	3	3	3	5	0	0	4333333	5	1	9	100
2	1	23	4	1	19	32	1.5	2	1	3	1	1	1	2.8	3	3	4	1	2	5	0	0	3	5	1	7	100
2	1	23	5	1	20	32	1	1	1	1	1	1	1	4.4	5	5	5	1	1	4	0	0	2	4	1	9	100
2	1	23	6	2	12	32	1	1	1	1	1	1	1	3	4	3	2	2	3	5	0	0	1333333	6	1	11	90.9
2	1	23	7	2	13	32	1.33333	1	1	1	1	1	3	4	5	3	4	1	1	1	0	0	1666667	6	1	10	100
2	1	23	8	2	15	32	1	1	1	1	1	1	1	3.2	4	3	4	1	1	2	0	0	3333333	5	3	10	90
2	1	23	9	2	18	32	1	1	1	1	1	1	1	3.6	4	3	5	2	2	1	0	0	2666667	6	2	9	100
2	1	23	10	2	19	32	1	1	1	1	1	1	1	4.2	4	4	6	4	1	1	0	0	2333333	5	1	10	100
2	1	23	11	2	22	32	1	1	1	1	1	1	1	3.6	4	2	5	1	1	4	0	0	2333333	6	1	11	100
2	1	23	12	3	12	32	1	1	1	1	1	1	1	5.2	6	5	5	5	1	1	0	0	1333333	6	1	10	100
2	1	23	13	3	13	32	1	1	1	1	1	1	1	4.2	4	5	5	1	1	2	0	0	2	7	5	10	100
2	1	23	14	3	15	32	3.33333	5	5	2	3	2	3	4.2	4	4	4	3	4	1	0	0	2	2	1	11	100
2	1	23	15	3	18	32	1	1	1	1	1	1	1	5	5	5	6	4	1	1	0	0	3666667	3	1	11	90.9
2	1	23	16	3	20	32	1.16667	1	2	1	1	1	1	4.4	5	5	5	1	1	1	0	0	2	6	3	10	80
2	1	23	17	4	14	32	1.66667	1	1	5	1	1	1	3.8	5	2	4	3	3	1	0	0	2666667	5	1	10	100
2	1	23	18	4	15	32	1	1	1	1	1	1	1	4.4	5	4	6	1	1	1	0	0	1666667	3	1	10	100
2	1	23	19	4	18	32	2	1	2	4	1	1	3	3	2	2	4	1	1	1	0	0	1666667	5	1	11	100
2	1	23	20	4	20	32	1	1	1	1	1	1	1	3.6	4	4	4	1	2	1	0	0	2666667	2	1	9	100
2	1	23	21	4	22	32	1.5	2	1	3	1	1	1	3.2	3	3	3	1	2	1	0	0	2333333	2	1	11	90.9
2	1	23	22	5	10	32	1	1	1	1	1	1	1	2.6	2	2	3	1	1	7	0	0	2333333	2	1	7	85.7
2	1	23	23	5	12	32	1	1	1	1	1	1	1	3	3	3	3	2	5	3	0	0	4333333	2	1	11	100
2	1	23	24	5	14	32	1.5	2	2	1	2	1	1	4.4	5	4	4	4	5	1	1	0	1666667	1	1	10	100
2	1	23	25	5	16	32	1.66667	1	1	5	1	1	1	4.2	5	7	5	1	1	1	1	0	1666667	7	1	10	80
2	1	23	26	5	20	32	1.66667	1	2	1	1	1	4	4	5	3	5	1	1	1	1	0	3333333	7		10	90
2	1	23	27	5	20	32	1.33333	1	1	1	1	1	3	3.4	5	4	3	1	1	2	1	0	3333333	5	1	8	100
2	1	23	28	6	11	32	4	4	7	6	1	4	2	2	2	4	2	1	4	4	1	1	4333333	7	1	11	100
2	1	23	29	6	13	32	1.16667	1	2	1	1	1	1	3.8	5	3	5	1	2	1	1	1	2	7	1	10	100
2	1	23	30	6	15	32	1.83333	1	1	1	1	1	6	5.4	6	5	5	6	1	3	0	0	1333333	6	1	11	100
2	1	23	31	6	20	32	1	1	1	1	1	1	1	4.6	5	4	5	3	1	1	1	0	1333333	7	1	10	90
2	1	23	32	6	21	32	1	1	1	1	1	1	1	4.8	6	6	5	1	1	1	0	0	1333333	5	5	8	100
3	0	20	1	1	9	32	1	1	1	1	1	1	1	4.2	4	4	4	4	1	5	0	0	1666667	4	5	10	100
3	0	20	2	1	9	32	1	1	1	1	1	1	1	4.4	5	4	4	4	1	3	0	0	2666667	4	4	11	100
3	0	20	3	1	12	32	1	1	1	1	1	1	1	4.8	5	5	5	4	1	1	0	0	3666667	5	1	13	100
3	0	20	4	1	13	32	1	1	1	1	1	1	1	4	5	5	5	4	2	1	0	0	4666667	3	3	11	100
3	0	20	5	1	16	32	1.16667	1	1	1	1	1	2	5	5	5	4	5	2	1	0	0	6	2	3	12	100
3	0	20	6	1	17	32	1	1	1	1	1	1	1	5.2	6	5	5	4	1	1	0	0	2	6	1	12	100
3	0	20	7	1	20	32	1	1	1	1	1	1	1	5.2	4	5	6	5	1	1	1	0	1666667	6	4	11	100
3	0	20	8	1	20	32	1	1	1	1	1	1	1	5.2	5	3	6	5	1	3	1	0	1333333	5	6	11	100
3	0	20	9	2	10	32	1	1	1	1	1	1	1	4.4	4	4	4	4	2	2	0	0	3	4	2	11	100
3	0	20	10	2	12	32	1	1	1	1	1	1	1	5.2	6	6	5	4	1	1	0	0	1666667	4	5	11	100
3	0	20	11	2	16	32	1.16667	1	2	1	1	1	1	4.8	5	5	4	5	3	3	0	0	5	2	4	12	100
3	0	20	12	2	17	32	1	1	1	1	1	1	1	5	5	5	5	5	1	1	1	0	2333333	5	5	12	100
3	0	20	13	2	18	32	1.16667	1	1	2	1	1	1	4.8	5	5	5	4	3	1	0	0	4666667	4	5	12	100
3	0	20	14	3	11	32	1.16667	1	1	2	1	1	1	4.4	6	5	4	4	1	1	1	1	4666667	3	5	12	100
3	0	20	15	3	19	32	1	1	1	1	1	1	1	5.6	6	6	5	4	1	3	1	0	1666667	5	4	13	100
3	0	20	16	3	20	32	1	1	1	1	1	1	1	4.6	5	4	4	4	3	6	0	0	2333333	3	4	11	100
3	0	20	17	4	11	32	1	1	1	1	1	1	1	4	4	4	4	3	1	2	1	0	1666667	4	4	13	100
3	0	20	18	4	13	32	1	1	1	1	1	1	1	4.4	5	5	4	4	3	2	0	0	4666667	4	5	12	100
3	0	20	19	4	17	32	1	1	1	1	1	1	1	5.6	6	6	5	6	2	3	1	0	1666667	4	5	12	100
3	0	20	20	4	20	32	1	1	1	1	1	1	1	5	5	5	5	4	2	5	0	0	4	4	5	11	100
3	0	20	21	4	21	32	1	1	1	1	1	1	1	4.8	5	5	4	4	2	5	0	0	1666667	3	5	10	100
3	0	20	22	5	10	32	1	1	1	1	1	1	1	3.4	3	3	4	3	1	5	1	0	3	1	4	11	100
3	0	20	23	5	12	32	1	1	1	1	1	1	1	5	6	5	4	5	2	3	1	0	3	4	4	11	100
3	0	20	24	5	14	32	1	1	1	1	1	1	1	5.6	6	5	6	5	1	1	1	0	3666667	5	5	13	100
3	0	20	25	5	18	32	1.16667	1	1	2	1	1	1	5	5	5	5	4	4	3	1	0	3	4	5	9	100
3	0	20	26	5	20	32	1	1	1	1	1	1	1	4.6	5	4	5	4	3	2	0	0	4	4	4	13	100
3	0	20	27	5	22	32	1	1	1	1	1	1	1	5	5	5	5	4	3	5	0	0	5	5	5	12	100
3	0	20	28	6	14	32	2	3	2	3	2	1	1	4.2	4	4	4	4	4	5	1	0	5	3	4	13	100
3	0	20	29	6	16	32	2	2	2	2	3	2	1	4.6	5	5	4	4	4	2	0	0	3333333	2	3	12	100
3	0	20	30	6	17	32	2.16667	2	3	2	2	3	1	4	4	4	3	4	4	3	0	0	4666667	2	5	12	100
3	0	20	31	6	18	32	2	2	3	2	2	2	1	3.8	4	3	4	4	4	4	0	0	3666667	2	3	13	100
3	0	20	32	6	21	32	2.16667	3	2	2	3	2	1	4	4	4	4	4	4	4	0	0	3666667	4	4	12	100
4	0	23	1	1	9	31	1.5	2	2	2	1	1	1	4.6	5	5	5	4	1	4	1	1	2666667	5	1	10	100
4	0	23	2	1	10	31	1	1	1	1	1	1	1	4.6	5	5	5	4	1	3	1	1	2333333	5	1	11	100
4	0	23	3	1	13	31	1	1	1	1	1	1	1	5	5	5	5	5	1	4	1	1	2	6	4	12	100
4	0	23	4	1	15	31	1	1	1	1	1	1	1	5	6	5	6	5	1	5	1	1	2333333	5	1	11	100
4	0	23	5	1	20	31	1.66667	1	5	1	1	1	1	5.6	5	5	6	5	1	5	0	0	1	7	1	12	100
4	0	23	6	2	15	31	1	1	1	1	1	1	1	6	5	5	7	6	1	3	1	1	1	7	1	13	100
4	0	23	7	2	19	31	1	1	1	1	1	1	1	6	5	6	7	5	1	2	1	1	1	7	2	13	100
4	0	23	8	2	21	31	1.5	1	1	4	1	1	1	4.8	5	5	5	4	1	4	0	0	2333333	4
4	0	23	9	2	21	31	1	1	1	1	1	1	1	5.4	5	5	6	5	1	5	0	0	1	4	3	11	100
4	0	23	10	3	10	31	1	1	1	1	1	1	1	5	5	5	6	4	1	2	0	0	2	4	1	14	100
4	0	23	11	3	12	31	1.33333	1	1	3	1	1	1	5.8	6	6	6	5	1	2	0	0	1	5	5	11	100
4	0	23	12	3	13	31	1	1	1	1	1	1	1	5.2	5	5	5	4	1	3	0	0	1333333	6	5	12	91.7
4	0	23	13	3	18	31	1	1	1	1	1	1	1	5.2	5	5	5	4	1	3	0	0	1	5	5	12	100
4	0	23	14	3	21	31	1	1	1	1	1	1	1	6	6	5	7	6	1	2	1	1	1333333	6	7	12	100
4	0	23	15	4	8	31	1	1	1	1	1	1	1	4.8	5	5	5	4	1	4	1	1	3333333	5	1	13	100
4	0	23	16	4	10	31	1	1	1	1	1	1	1	4.6	5	5	4	4	1	1	1	1	3	5	5	12	91.7
4	0	23	17	4	11	31	1	1	1	1	1	1	1	4.8	5	5	5	4	1	5	1	1	2333333	4	1	12	100
4	0	23	18	4	13	31	1	1	1	1	1	1	1	5	5	5	5	5	1	4	1	1	2333333	4	5	11	90.9
4	0	23	19	4	15	31	1	1	1	1	1	1	1	4.4	5	4	5	4	1	4	1	1	2333333	3	5	11	100
4	0	23	20	4	19	31	1	1	1	1	1	1	1	6	5	5	7	6	1	4	1	1	1	4	7	10	100
4	0	23	21	5	7	31	1	1	1	1	1	1	1	5	5	5	5	4	1	3	1	0	1666667	2	5	10	100
4	0	23	22	5	12	31	1	1	1	1	1	1	1	4.4	5	4	4	4	1	5	1	1	2333333	3	1	12	100
4	0	23	23	5	14	31	1	1	1	1	1	1	1	4	4	4	4	3	1	6	1	1	3	2	1	11	100
4	0	23	24	5	16	31	1	1	1	1	1	1	1	4.6	5	5	4	4	1	5	1	1	2666667	3	5	11	100
4	0	23	25	5	20	31	1	1	1	1	1	1	1	5	5	5	5	5	1	6	0	0	1	4	1	12	100
4	0	23	26	6	10	31	1.16667	1	2	1	1	1	1	4.8	5	5	5	4	1	4	1	1	2	3	4	12	100
4	0	23	27	6	11	31	1	1	1	1	1	1	1	4.8	5	5	5	4	1	4	1	1	2333333	3	1	12	100
4	0	23	28	6	14	31	1	1	1	1	1	1	1	5	6	5	5	4	1	5	1	1	2333333	3	1	13	100
4	0	23	29	6	15	31	1	1	1	1	1	1	1	4.6	4	5	5	4	1	5	1	1	2666667	3	3	12	100
4	0	23	30	6	17	31	1	1	1	1	1	1	1	5	5	4	5	4	1	5	0	0	1	5	6	13	100
4	0	23	31	6	21	31	1	1	1	1	1	1	1	5.4	5	5	6	4	1	6	0	0	2	2	1	13	100
5	1	20	1	1	8	33	1.16667	1	2	1	1	1	1	6.2	7	6	6	6	1	5	0	0	1	7	1	11	90.9
5	1	20	2	1	10	33	2	2	2	2	2	2	2	6.2	7	6	6	6	2	6	1	1	2666667	6	5	9	100
5	1	20	3	1	12	33	1.5	1	1	1	2	3	1	6	6	7	6	5	1	1	1	1	1	6	3	12	100
5	1	20	4	1	14	33	2.33333	3	1	6	2	1	1	2.8	2	2	2	2	1	6	1	1	2666667	1	3	10	100
5	1	20	5	1	16	33	1.33333	2	1	2	1	1	1	6.2	6	7	5	6	1	6	0	0	1	6	1	11	90.9
5	1	20	6	1	17	33	2	2	2	2	2	2	2	6.2	7	6	6	6	6	6	1	0	2666667	6	1	12	100
5	1	20	7	1	19	33	2	2	2	2	2	2	2	5.6	6	4	6	6	2	6	1	0	1	6	4	11	90.9
5	1	20	8	1	20	33	1.83333	2	1	2	2	2	2	6	6	6	6	6	2	1	1	0	1333333	6	3	9	100
5	1	20	9	2	10	33	2	2	2	2	2	2	2	5.2	6	6	6	6	2	2	1	0	1666667	5	1	12	100
5	1	20	10	2	11	33	1.83333	2	2	2	1	2	2	5.4	6	6	6	6	2	6	1	0	1666667	6	1	12	91.7
5	1	20	11	2	18	33	1.83333	2	2	2	1	2	2	6.2	7	6	6	6	3	2	1	1	1666667	6	4	11	100
5	1	20	12	2	21	33	1.66667	1	1	2	2	2	2	6	6	6	6	6	2	6	1	1	2	6	1	12	91.7
5	1	20	13	3	8	33	2	2	2	2	2	2	2	6	6	6	6	6	2	1	0	0	1333333	6	2	11	100
5	1	20	14	3	10	33	2.33333	2	2	2	2	3	3	6	6	6	6	6	2	3	0	0	1666667	7	5	12	91.7
5	1	20	15	3	11	33	2	2	2	2	2	2	2	6.2	7	6	6	6	1	1	0	0	1666667	7	2	12	100
5	1	20	16	3	14	33	2	2	2	2	2	2	2	6	6	6	6	6	2	4	1	1	1	7	4	12	100
5	1	20	17	3	20	33	2	2	2	2	2	2	2	6	6	6	6	6	2	6	1	0	1666667	6	4	11	81.8
5	1	20	18	4	10	33	1	1	1	1	1	1	1	5.4	6	4	7	6	4	5	1	0	1	6	1	13	100
5	1	20	19	4	12	33	1.16667	1	1	2	1	1	1	6.2	7	6	6	6	1	4	1	0	1	6	2	12	100
5	1	20	20	4	13	33	2.66667	2	2	2	2	2	6	6	6	6	6	6	2	1	1	0	1	7	2	11	90.9
5	1	20	21	4	16	33	1	1	1	1	1	1	1	5.2	7	1	6	6	1	1	1	1	3	6	4	12	100
5	1	20	22	4	19	33	1.16667	1	1	1	1	1	2	6	6	6	6	6	1	4	1	1	1	6	5	13	100
5	1	20	23	4	20	33	1.16667	1	2	1	1	1	1	5.2	7	1	6	6	1	6	1	1	1	7	4	13	100
5	1	20	24	5	10	33	1.16667	1	1	1	2	1	1	6.2	6	7	6	6	1	4	0	0	1333333	6	1	12	100
5	1	20	25	5	11	33	1.83333	3	1	2	3	1	1	5.8	6	6	6	6	3	4	0	0	2666667	3	3	12	100
5	1	20	26	5	14	33	1	1	1	1	1	1	1	6	6	6	6	6	1	4	1	0	1	7	1	13	100
5	1	20	27	5	15	33	1.66667	2	1	3	2	1	1	6.8	7	7	7	7	1	5	0	0	1	7	1	13	92.3
5	1	20	28	5	17	33	1	1	1	1	1	1	1	6.6	7	7	6	7	1	4	0	0	1	7	5	12	100
5	1	20	29	5	22	33	1	1	1	1	1	1	1	7	7	7	7	7	1	1	0	0	1	7	1	11	100
5	1	20	30	6	10	33	1	1	1	1	1	1	1	6.4	7	7	6	6	1	5	0	1	1	7	1	12	100
5	1	20	31	6	11	33	1	1	1	1	1	1	1	6.4	7	7	6	6	1	5	1	1	1	7	4	11	90.9
5	1	20	32	6	20	33	1.16667	1	1	1	1	2	1	7	7	7	7	7	2	5	1	1	1	7	4	11	90.9
5	1	20	33	6	22	33	1.5	1	1	4	1	1	1	6.2	7	7	6	6	1	6	1	1	1	7	6	12	100
6	1	72	1	1	7	36	1	1	1	1	1	1	1	5	5	5	5	4	2	3	1	0	2333333	5	2	8	100
6	1	72	2	1	9	36	1.5	1	1	3	1	2	1	4.6	6	6	4	4	2	5	1	1	4666667	6	6	9	88.9
6	1	72	3	1	14	36	1.16667	2	1	1	1	1	1	4.6	6	4	4	4	2	4	0	0	2666667	6	1	8	87.5
6	1	72	4	1	16	36	1.16667	2	1	1	1	1	1	5.4	6	5	5	6	1	3	0	0	3	6	1	8	87.5
6	1	72	5	1	18	36	1	1	1	1	1	1	1	5	5	5	5	5	1	4	0	0	4333333	6	1	9	100
6	1	72	6	1	19	36	1	1	1	1	1	1	1	4.4	5	4	4	4	2	4	1	0	2333333	6	4	7	71.4
6	1	72	7	1	21	36	1	1	1	1	1	1	1	4.6	5	5	4	4	2	4	0	0	3	6	1	9	100
6	1	72	8	2	11	36	1.16667	2	1	1	1	1	1	4.6	5	5	4	4	2	4	1	0	3333333	6	1	9	100
6	1	72	9	2	12	36	1	1	1	1	1	1	1	4.6	5	5	5	4	2	3	1	0	2666667	6	2	8	100
6	1	72	10	2	14	36	1	1	1	1	1	1	1	4.6	5	5	4	4	1	3	0	0	2666667	6	2	8	75
6	1	72	11	2	15	36	1	1	1	1	1	1	1	4.6	5	5	5	4	1	4	0	0	2666667	6	4	8	100
6	1	72	12	2	18	36	1	1	1	1	1	1	1	4.6	5	5	4	4	2	4	0	0	2666667	3	1	8	100
6	1	72	13	2	21	36	1.16667	1	1	1	2	1	1	4.6	5	5	4	4	1	4	0	0	3	6	1	8	100
6	1	72	14	3	7	36	1	1	1	1	1	1	1	4.8	5	5	5	4	3	3	0	0	3	5	1	8	100
6	1	72	15	3	16	36	1	1	1	1	1	1	1	4.4	5	3	5	4	2	5	1	1	2	6	1	8	100
6	1	72	16	3	17	36	1.16667	1	1	2	1	1	1	4.8	5	4	5	5	2	5	1	1	2666667	3	1	7	100
6	1	72	17	3	18	36	1	1	1	1	1	1	1	4.6	5	4	5	4	2	5	1	1	3	5	4	7	85.7
6	1	72	18	3	22	36	1	1	1	1	1	1	1	4.2	4	4	4	4	2	5	1	0	2	6	2	7	100
6	1	72	19	4	7	36	1.16667	2	1	1	1	1	1	4	4	5	4	2	4	3	0	0	2	6	1	7	100
6	1	72	20	4	9	36	1.16667	2	1	1	1	1	1	4.4	5	5	4	4	2	3	1	0	2	5	1	9	100
6	1	72	21	4	11	36	1	1	1	1	1	1	1	4.6	5	5	5	4	2	4	1	1	2333333	6	2	7	85.7
6	1	72	22	4	14	36	1	1	1	1	1	1	1	5	5	5	5	4	1	3	0	1	2333333	6	1	7	100
6	1	72	23	4	17	36	1.16667	1	1	2	1	1	1	4.6	5	5	4	4	2	4	0	0	2666667	6	1	8	100
6	1	72	24	4	21	36	1	1	1	1	1	1	1	4.4	5	4	5	4	1	5	1	0	3	5	2	8	87.5
6	1	72	25	5	9	36	1	1	1	1	1	1	1	4.2	4	5	4	3	1	5	1	0	2666667	5	1	7	100
6	1	72	26	5	10	36	1.16667	2	1	1	1	1	1	4.4	4	5	5	4	2	3	0	0	5666667	5	1	7	85.7
6	1	72	27	5	11	36	1	1	1	1	1	1	1	5	5	5	5	5	1	3	0	1	2	6	1	8	100
6	1	72	28	5	14	36	1.16667	2	1	1	1	1	1	4.2	5	4	4	3	2	3	0	1	3333333	4	1	8	100
6	1	72	29	5	15	36	1.16667	2	1	1	1	1	1	4.4	5	4	4	4	2	4	0	0	2666667	6	1	8	87.5
6	1	72	30	5	18	36	1.33333	1	1	3	1	1	1	4.2	4	5	4	4	2	4	1	0	3	5	1	8	100
6	1	72	31	6	8	36	1.16667	1	1	2	1	1	1	4.4	4	5	4	5	3	3	0	1	2	6	1	9	88.9
6	1	72	32	6	9	36	1.16667	2	1	1	1	1	1	4.8	5	5	5	4	3	3	0	1	2333333	5	1	8	100
6	1	72	33	6	13	36	1.66667	3	1	3	1	1	1	3.6	4	4	3	3	3	3	0	0	2666667	3	1	7	100
6	1	72	34	6	16	36	1.66667	4	1	2	1	1	1	3.8	4	4	4	3	1	4	0	0	3333333	6	1	8	87.5
6	1	72	35	6	18	36	2	4	1	3	2	1	1	3.8	4	4	3	3	2	4	0	0	3	3	1	9	100
6	1	72	36	6	21	36	1.66667	3	1	2	2	1	1	3.8	5	4	4	2	2	4	0	0	2333333	5	3	7	85.7
7	0	51	1	1	7	35	2.5	3	2	3	3	2	2	4.2	4	4	4	4	3	4	1	0	2333333	5	2	11	100
7	0	51	2	1	10	35	2.16667	3	2	3	2	1	2	4.2	4	4	4	4	3	3	0	0	5	5	2	11	72.7
7	0	51	3	1	11	35	2	2	2	2	2	2	2	4.2	4	4	5	4	4	3	0	0	5	5	2	11	90.9
7	0	51	4	1	13	35	2	2	2	2	2	2	2	4	4	4	4	4	3	3	0	0	2666667	5	2	10	90
7	0	51	5	1	15	35	2.16667	3	2	2	2	2	2	4	4	4	4	4	4	3	0	0	5	5	2	11	90.9
7	0	51	6	1	22	35	2.16667	3	2	2	2	2	2	3.8	4	3	4	4	4	6	1	0	2333333	4	3	10	100
7	0	51	7	2	8	35	2	2	2	2	2	2	2	4.4	5	5	4	4	3	2	1	0	3333333	5	2	11	72.7
7	0	51	8	2	9	35	2	2	2	2	2	2	2	4.6	5	5	5	4	3	2	1	1	2	6	4	11	100
7	0	51	9	2	12	35	2	2	2	2	2	2	2	4.4	5	4	4	4	3	3	1	1	2333333	5	4	10	90
7	0	51	10	2	14	35	2	2	2	2	2	2	2	5	5	5	5	5	4	4	1	1	2333333	5	3	10	90
7	0	51	11	2	17	35	2	2	2	2	2	2	2	4	4	3	4	4	4	5	1	1	3	4	6	10	90
7	0	51	12	2	21	35	2	2	2	2	2	2	2	3.4	3	3	4	3	4	7	1	0	3666667	4	3	9	88.9
7	0	51	13	3	8	35	2.33333	4	2	2	2	2	2	3.8	4	3	4	4	4	4	1	1	3333333	5	5	11	100
7	0	51	14	3	10	35	2	2	2	2	2	2	2	3.8	4	3	4	4	4	4	1	1	3	5	5	11	100
7	0	51	15	3	12	35	2	2	2	2	2	2	2	4	4	4	4	4	4	5	1	1	3	5	2	11	100
7	0	51	16	3	13	35	2.16667	2	2	2	3	2	2	3.8	4	4	4	4	4	5	1	1	3	5	2	11	90.9
7	0	51	17	3	16	35	2	2	2	2	2	2	2	4.2	5	4	4	4	4	5	1	1	3666667	5	4	10	90
7	0	51	18	3	18	35	2.33333	2	2	4	2	2	2	3.8	4	3	4	4	4	7	1	1	4666667	5	4	10	90
7	0	51	19	3	18	35	2.16667	2	2	3	2	2	2	3.2	3	2	4	3	4	6	1	1	4666667	5	5	10	90
7	0	51	20	4	7	35	2.16667	3	2	2	2	2	2	3.8	3	3	4	4	4	6	1	0	3333333	4	2	12	91.7
7	0	51	21	4	9	35	2	2	2	2	2	2	2	4.8	4	5	5	5	4	5	1	1	3	5	2	11	100
7	0	51	22	4	11	35	2	2	2	2	2	2	2	4.4	4	4	5	4	3	4	1	1	3	5	2	11	100
7	0	51	23	4	13	35	2	2	2	2	2	2	2	4.2	5	4	4	4	4	4	1	1	3333333	5	2	10	100
7	0	51	24	4	16	35	2	2	2	2	2	2	2	3.6	4	4	4	4	4	5	1	1	3333333	5	2	11	90.9
7	0	51	25	4	18	35	2	2	2	2	2	2	2	4.4	5	5	4	4	3	5	0	0	3333333	4	4	11	90.9
7	0	51	26	4	20	35	2	2	2	2	2	2	2	4	4	4	4	4	3	5	1	0	3	5		10	80
7	0	51	27	4	20	35	2	2	2	2	2	2	2	4	4	4	4	4	4	5	1	0	3333333	4	4	10	90
7	0	51	28	5	10	35	2	2	2	2	2	2	2	4	4	4	4	4	4	5	0	0	3333333	5	2	12	100
7	0	51	29	5	12	35	2	2	2	2	2	2	2	4.4	4	4	6	4	4	4	1	0	3333333	5	2	10	90
7	0	51	30	5	13	35	2	2	2	2	2	2	2	3.4	4	4	3	4	4	6	1	0	4333333	5	2	12	100
7	0	51	31	5	16	35	2	2	2	2	2	2	2	3.8	4	4	4	3	4	5	1	0	4333333	5	6	11	90.9
7	0	51	32	6	11	35	2	2	2	2	2	2	2	4.2	4	4	4	4	4	5	0	0	4333333	5	2	11	100
7	0	51	33	6	13	35	2	2	2	2	2	2	2	4	4	4	4	4	4	5	1	0	4666667	5	2	12	91.7
7	0	51	34	6	15	35	2	2	2	2	2	2	2	4.4	4	4	5	4	3	5	0	0	4666667	5	2	10	100
7	0	51	35	6	17	35	2	2	2	2	2	2	2	4	4	4	4	4	4	5	0	0	2	4	2	11	90.9
8	0	22	1	1	8	25	2.16667	2	3	2	3	2	1	5.2	6	5	6	5	4	2	1	1	4333333	5	2	13	100
8	0	22	2	1	10	25	1.66667	2	3	1	1	2	1	5.2	6	5	5	5	4	5	1	1	4	4	5	13	100
8	0	22	3	1	12	25	1.66667	1	3	1	2	2	1	5.4	6	5	6	5	3	4	1	1	4	5	4	13	100
8	0	22	4	1	20	25	2.66667	3	2	4	2	2	3	4	4	3	5	3	3	5	1	0	3666667	4	4	13	84.6
8	0	22	5	2	8	25	1.83333	2	2	1	2	2	2	5.2	5	5	6	5	4	3	1	1	4666667	5	4	13	92.3
8	0	22	6	2	9	25	1.83333	2	2	2	2	1	2	5.2	6	5	6	4	3	3	1	1	3666667	5	2	12	100
8	0	22	7	2	14	25	1.5	1	2	2	1	2	1	4.8	5	4	6	4	3	2	1	1	4333333	3	4	13	100
8	0	22	8	2	15	25	1	1	1	1	1	1	1	3.8	4	3	5	3	2	3	1	1	4333333	4	3	11	90.9
8	0	22	9	2	16	25	1.5	1	1	1	3	1	2	4.6	4	4	5	5	3	3	0	1	2	4	2	13	100
8	0	22	10	3	8	25	2.5	3	2	1	4	3	2	4	4	4	4	4	4	3	1	1	4	3	2	13	100
8	0	22	11	3	13	25	2.66667	2	5	1	2	3	3	3.8	4	4	5	4	5	3	1	1	2333333	4	4	13	100
8	0	22	12	3	16	25	1.5	2	1	1	1	2	2	4.8	5	4	5	5	3	3	1	1	3	6	2	13	100
8	0	22	13	3	20	25	2.33333	3	2	2	3	2	2	3.8	3	4	4	3	4	5	1	1	4	3
8	0	22	14	4	17	25	3.16667	4	3	1	4	3	4	3.8	4	3	4	4	5	5	1	1	4	3	3	12	91.7
8	0	22	15	4	19	25	3.16667	5	2	3	3	3	3	3.4	3	3	4	3	2	5	1	0	4666667	3
8	0	22	16	4	19	25	2.83333	3	3	1	5	3	2	4.2	5	4	4	4	3	5	0	0	3666667	6	1	12	100
8	0	22	17	5	11	25	2.66667	5	2	3	2	2	2	4	4	4	4	3	2	2	0	0	5	4	1	10	100
8	0	22	18	5	14	25	2	3	2	2	2	1	2	5	5	5	5	5	1	3	0	0	1	6	1	11	100
8	0	22	19	5	17	25	1.83333	2	2	1	4	1	1	4.8	5	5	5	4	1	1	0	0	1333333	5	1	10	100
8	0	22	20	5	22	25	1.5	2	2	1	2	1	1	4.6	5	5	5	4	1	2	1	1	2666667	5	4	11	100
8	0	22	21	6	10	25	1.33333	2	1	1	1	1	2	4.6	5	4	5	4	3	4	1	0	2666667	5	2	14	100
8	0	22	22	6	13	25	1.33333	2	1	1	1	2	1	4.6	4	3	6	4	2	6	1	0	2	5	4	12	100
8	0	22	23	6	15	25	1.5	2	1	1	1	2	2	5	5	4	6	5	4	5	1	0	1666667	6	3	13	100
8	0	22	24	6	21	25	1.5	2	2	2	1	1	1	4.4	5	3	5	4	3	6	1	1	3666667	5
8	0	22	25	6	21	25	2	2	2	3	2	1	2	4.4	4	5	4	4	3	6	1	1	4	4	5	12	100
9	0	53	1	1	9	34	1.66667	2	2	3	1	1	1	5.6	5	6	6	5	1	1	1	1	2	6	5	9	100
9	0	53	2	1	9	34	1.33333	1	1	2	2	1	1	6.2	6	6	6	6	2	1	1	1	1666667	6	3	11	100
9	0	53	3	1	13	34	1	1	1	1	1	1	1	6	6	6	6	5	1	3	1	1	1666667	6	6	10	100
9	0	53	4	1	16	34	1	1	1	1	1	1	1	5.8	5	5	7	6	1	4	1	1	2	6	4	10	100
9	0	53	5	1	18	34	1.16667	1	2	1	1	1	1	5.6	5	6	6	5	1	4	1	1	2	6	5	10	100
9	0	53	6	1	19	34	1.5	1	1	3	2	1	1	5.4	5	5	6	5	2	4	1	1	2333333	5	5	10	100
9	0	53	7	2	8	34	1.16667	1	1	2	1	1	1	4.8	4	5	5	5	1	4	1	1	3666667	5	3	10	100
9	0	53	8	2	10	34	1	1	1	1	1	1	1	4.6	5	5	6	1	1	5	1	1	3	5	4	10	100
9	0	53	9	2	15	34	1.16667	1	1	2	1	1	1	4.8	5	4	6	4	2	4	1	1	4333333	5	3	10	100
9	0	53	10	2	18	34	4	3	3	5	6	2	5	2.6	3	4	2	2	5	5	1	0	5333333	4	6	11	63.6
9	0	53	11	2	20	34	1	1	1	1	1	1	1	5.8	5	6	6	5	2	5	1	1	1666667	7	3	11	90.9
9	0	53	12	2	21	34	1	1	1	1	1	1	1	5.4	6	6	5	4	1	4	1	1	2333333	5	3	10	100
9	0	53	13	3	9	34	1.33333	1	2	1	1	1	2	5.8	5	6	7	5	2	3	1	1	2666667	4	5	11	100
9	0	53	14	3	11	34	1.33333	1	3	1	1	1	1	5.8	5	6	6	6	1	2	1	1	4	2	6	11	90.9
9	0	53	15	3	14	34	1.16667	1	2	1	1	1	1	6	5	6	7	6	1	2	0	1	2	7	2	11	100
9	0	53	16	3	15	34	1.16667	1	2	1	1	1	1	5.6	5	6	6	7	3	1	1	1	2666667	7	7	11	90.9
9	0	53	17	3	18	34	1	1	1	1	1	1	1	4.8	5	4	6	4	2	3	1	0	1333333	3	4	11	100
9	0	53	18	3	21	34	1	1	1	1	1	1	1	4.6	5	4	6	4	1	4	1	0	3333333	4	3	10	100
9	0	53	19	4	9	34	2	2	3	4	1	1	1	3.6	5	5	3	3	2	2	0	0	6	5	3	11	100
9	0	53	20	4	9	34	2	2	3	2	2	1	2	4.6	4	5	5	5	2	2	0	0	5666667	5	2	11	100
9	0	53	21	4	11	34	1.83333	3	2	1	2	1	2	4	3	4	5	4	4	5	0	0	5333333	3	2	10	100
9	0	53	22	4	21	34	1	1	1	1	1	1	1	3.2	3	2	4	1	1	6	0	0	1333333	3	1	11	100
9	0	53	23	5	9	34	1	1	1	1	1	1	1	7	7	7	7	7	1	1	1	1	1666667	6	4	11	100
9	0	53	24	5	14	34	1	1	1	1	1	1	1	6.4	6	6	7	6	1	1	1	1	1666667	5	4	11	100
9	0	53	25	5	15	34	1	1	1	1	1	1	1	6.4	6	6	7	6	1	1	1	1	2	6	5	11	100
9	0	53	26	5	17	34	2	3	5	1	1	1	1	4.6	4	4	6	4	3	1	1	1	2333333	5	6	11	81.8
9	0	53	27	5	19	34	1.16667	2	1	1	1	1	1	5	5	5	6	4	3	6	1	1	2666667	4	4	11	100
9	0	53	28	5	20	34	1	1	1	1	1	1	1	6.2	6	5	7	6	1	4	1	0	2	6	5	9	100
9	0	53	29	6	9	34	1.16667	2	1	1	1	1	1	5	5	4	6	4	2	4	1	1	3	4	1	12	100
9	0	53	30	6	10	34	1	1	1	1	1	1	1	5.6	6	5	6	5	2	3	1	1	2333333	6	2	11	100
9	0	53	31	6	13	34	1	1	1	1	1	1	1	4.6	5	6	5	4	1	3	1	1	3	6	3	11	100
9	0	53	32	6	15	34	1	1	1	1	1	1	1	5.6	5	6	6	5	2	3	0	1	1333333	4	2	10	100
9	0	53	33	6	20	34	1	1	1	1	1	1	1	6.2	6	7	7	5	1	3	1	1	1	7	7	9	100
9	0	53	34	6	21	34	1	1	1	1	1	1	1	6.8	6	7	7	7	1	1	1	1	1	7	2	10	100
10	0	54	1	2	7	25	2	2	2	2	2	2	2	5.2	5	5	5	5	2	3	1	1	2	4	5	6	100
10	0	54	2	2	12	25	1.5	1	2	1	1	2	2	5.4	6	5	5	5	2	3	0	1	2666667	5	2	8	100
10	0	54	3	2	18	25	2	2	2	2	2	2	2	4.8	5	4	5	5	3	4	1	0	3333333	5
10	0	54	4	3	10	25	2	2	2	2	2	2	2	4.2	4	4	5	4	2	5	0	1	3	5	2	10	100
10	0	54	5	3	15	25	1.83333	2	2	2	2	1	2	4.8	5	4	5	5	3	4	0	1	2333333	2	2	10	100
10	0	54	6	3	18	25	1.33333	1	2	1	1	2	1	4.6	5	4	5	4	3	5	1	0	1333333	6
10	0	54	7	3	18	25	2	2	2	2	2	2	2	4.4	4	4	5	5	3	5	0	1	4333333	4	2	10	100
10	0	54	8	4	9	25	1.33333	1	2	2	1	1	1	5	5	5	5	5	2	4	1	1	2333333	5	6	6	100
10	0	54	9	4	11	25	1.16667	1	1	1	2	1	1	5.6	6	6	5	5	2	4	1	1	2	6	3	10	100
10	0	54	10	4	14	25	1.5	2	1	2	2	1	1	6	6	6	6	6	2	3	1	1	3	5	7	7	100
10	0	54	11	4	17	25	1.66667	2	1	3	2	1	1	4.6	5	4	5	4	3	5	1	0	2333333	5	6	9	100
10	0	54	12	4	19	25	1.16667	1	1	2	1	1	1	5.6	6	5	6	5	2	5	0	0	1333333	6	2	10	80
10	0	54	13	4	20	25	2	2	2	2	2	2	2	4.8	5	3	6	4	2	6	0	0	1	7	2	10	100
10	0	54	14	5	8	25	1.83333	2	1	2	2	2	2	5.4	6	5	6	5	2	3	1	0	1666667	6	2	11	100
10	0	54	15	5	18	25	1.16667	1	2	1	1	1	1	6	6	5	6	6	1	2	1	1	1333333	5	5	9	100
10	0	54	16	5	21	25	1	1	1	1	1	1	1	6	6	6	6	6	1	2	1	1	1	7	6	9	100
10	0	54	17	6	10	25	1.33333	1	2	2	1	1	1	5.6	6	6	6	5	2	2	1	0	2666667	4	3	10	100
10	0	54	18	6	13	25	1.66667	1	1	2	2	2	2	6	6	6	6	6	2	3	0	0	2333333	5	4	11	100
10	0	54	19	6	20	25	1	1	1	1	1	1	1	5.8	6	5	6	6	2	3	1	0	2	6	4	11	100
10	0	54	20	7	10	25	1.83333	2	1	2	2	2	2	4.4	4	4	5	4	2	5	1	0	3	6	4	9	100
10	0	54	21	7	12	25	2	2	2	2	2	2	2	4.6	5	4	5	4	2	5	1	0	2666667	5	2	10	100
10	0	54	22	7	13	25	2	2	2	2	2	2	2	4.6	5	4	5	4	2	5	0	0	3	5	2	12	100
10	0	54	23	7	16	25	2.16667	2	2	3	2	2	2	4.8	5	5	5	4	3	5	1	0	4	5	3	11	100
10	0	54	24	7	21	25	2	2	2	2	2	2	2	4	4	3	5	3	3	6	0	0	2	5
10	0	54	25	7	21	25	2.16667	2	2	3	2	2	2	4.6	4	6	4	4	3	5	1	0	2	5	4	10	100
11	0	20	1	1	9	30	2.33333	2	3	2	2	1	4	4	3	3	4	5	4	6	0	0	1666667	4	2	11	100
11	0	20	2	1	11	30	2.16667	2	2	1	4	3	1	4.6	5	4	5	5	4	4	0	0	5	4	2	11	100
11	0	20	3	1	14	30	2.5	2	2	2	3	3	3	4.4	5	4	5	4	5	3	0	0	2666667	4	4	11	100
11	0	20	4	1	16	30	2.5	2	3	5	2	1	2	5.8	6	6	7	6	2	3	0	0	2333333	6	4	10	90
11	0	20	5	1	17	30	1.83333	2	2	3	2	1	1	5.6	6	5	6	5	2	2	0	0	1666667	6	4	12	100
11	0	20	6	1	21	30	1.16667	1	2	1	1	1	1	6.2	6	6	7	6	1	2	1	1	1	6	5	11	100
11	0	20	7	2	10	30	1.83333	2	4	1	1	2	1	5	5	5	5	6	4	5	0	0	3666667	5	1	12	100
11	0	20	8	2	14	30	1.5	1	2	1	1	3	1	5	5	5	5	6	2	4	0	0	2666667	6	3	12	91.7
11	0	20	9	2	15	30	1.5	2	2	2	1	1	1	5.2	5	5	5	6	2	3	1	1	3	6	6	9	88.9
11	0	20	10	2	17	30	1.33333	2	2	1	1	1	1	5.2	6	6	5	7	4	3	1	1	2666667	6	5	11	100
11	0	20	11	2	20	30	1.16667	1	2	1	1	1	1	6.4	6	6	6	7	1	4	1	1	1333333	7	5	11	100
11	0	20	12	2	21	30	1	1	1	1	1	1	1	5	6	4	7	6	3	4	1	1	1333333	6	4	11	100
11	0	20	13	3	12	30	1.33333	1	2	1	1	2	1	4.6	6	3	5	5	4	6	1	0	3333333	4	2	12	100
11	0	20	14	3	14	30	1.5	2	2	1	1	2	1	5	5	3	6	6	3	6	1	1	4	6	3	12	100
11	0	20	15	4	9	30	2.16667	2	2	2	2	2	3	5.6	5	5	6	6	4	5	0	0	2333333	6	2	12	100
11	0	20	16	4	9	30	1.66667	1	3	2	2	1	1	5.8	6	5	6	6	4	3	0	0	2333333	6	2	11	100
11	0	20	17	4	12	30	1.16667	1	2	1	1	1	1	6.2	6	6	7	6	2	2	1	0	1666667	6	2	11	100
11	0	20	18	4	13	30	1.33333	1	2	1	1	1	2	6.2	6	6	6	7	2	2	0	0	1666667	6	4	12	100
11	0	20	19	4	15	30	2.66667	1	4	4	1	5	1	5	5	6	6	2	5	3	1	0	5333333	5	4	11	100
11	0	20	20	4	17	30	1.16667	1	2	1	1	1	1	5.8	5	6	6	5	2	3	1	0	1666667	6	2	12	100
11	0	20	21	4	22	30	1.16667	1	2	1	1	1	1	6.2	6	6	6	6	1	2	1	0	1666667	5	6	11	100
11	0	20	22	5	10	30	1.66667	1	2	1	2	2	2	5.4	6	4	6	6	3	3	1	0	1666667	6	4	11	90.9
11	0	20	23	5	15	30	2.16667	2	1	3	1	2	4	4.6	6	5	5	4	4	4	1	0	5666667	4	3	14	92.9
11	0	20	24	5	18	30	2.83333	4	2	2	4	4	1	5.2	6	5	5	5	4	3	0	0	3	5	2	12	100
11	0	20	25	5	19	30	2.33333	3	3	2	2	2	2	4.8	5	3	6	5	3	2	1	0	2	6	6	11	100
11	0	20	26	6	11	30	2	2	2	3	1	3	1	5.2	6	5	6	5	3	4	0	0	2666667	4	2	12	100
11	0	20	27	6	14	30	1.83333	1	2	2	2	2	2	5.4	6	5	6	5	3	3	1	1	4	3	5	11	90.9
11	0	20	28	6	15	30	1.5	2	2	1	2	1	1	5	5	6	5	5	2	3	1	1	5	4	4	11	81.8
11	0	20	29	6	18	30	1.16667	1	1	1	1	1	2	5.8	6	5	6	6	2	3	1	1	1333333	7	3	12	100
11	0	20	30	6	22	30	1.16667	1	1	1	1	1	2	6.2	6	6	6	7	2	3	1	0	1666667	6	5	12	100
12	0	21	1	2	9	28	1.66667	3	1	1	2	2	1	3.6	3	3	3	3	5	5	0	0	1	7	4	11	100
12	0	21	2	2	10	28	2.83333	4	1	2	2	3	5	3.6	5	3	3	3	5	5	0	0	3	5	1	12	100
12	0	21	3	2	14	28	1.83333	1	2	2	2	2	2	4.6	5	6	5	4	4	2	1	1	4666667	3	5	11	100
12	0	21	4	2	19	28	1	1	1	1	1	1	1	5.2	5	6	6	4	2	1	1	1	3	7	5	12	100
12	0	21	5	2	21	28	1.33333	1	2	2	1	1	1	6	6	6	6	6	2	3	1	1	3	6
12	0	21	6	2	21	28	2	2	2	5	1	1	1	2.4	2	4	3	1	5	5	1	1	5333333	5	2	12	100
12	0	21	7	3	9	28	3	4	4	4	1	4	1	4	5	5	3	5	5	2	1	1	2333333	5	6	12	91.7
12	0	21	8	3	11	28	1.66667	1	4	2	1	1	1	5	5	5	5	5	5	1	1	1	3666667	7	6	12	100
12	0	21	9	3	17	28	1	1	1	1	1	1	1	6	6	6	6	6	2	2	1	1	3	5	3	13	100
12	0	21	10	3	19	28	1	1	1	1	1	1	1	6.6	6	7	7	6	1	3	1	1	1	6	5	12	91.7
12	0	21	11	3	22	28	1.83333	2	2	2	2	2	1	3.6	4	2	4	5	3	6	0	0	6333333	2	5	12	100
12	0	21	12	4	10	28	1.66667	1	2	1	1	2	3	4.6	4	6	4	4	4	2	0	0	5666667	3	7	12	83.3
12	0	21	13	4	11	28	2.16667	2	2	4	1	1	3	4.6	5	5	4	4	4	1	0	0	4333333	3	6	13	100
12	0	21	14	4	14	28	1.16667	1	1	2	1	1	1	5.8	6	6	5	6	4	2	1	1	2	6	6	11	100
12	0	21	15	4	16	28	1	1	1	1	1	1	1	5	6	6	6	1	1	2	1	1	1	6	7	12	91.7
12	0	21	16	4	21	28	1	1	1	1	1	1	1	4.8	5	3	5	4	1	5	1	0	1333333	1	4	14	100
12	0	21	17	5	10	28	1.66667	2	3	2	1	1	1	3.8	3	3	4	5	2	6	0	0	1	4	4	11	100
12	0	21	18	5	12	28	1.5	2	1	1	1	1	3	3.6	4	3	1	5	4	5	1	0	3	3	4	12	100
12	0	21	19	5	13	28	2	3	3	2	1	2	1	4.4	4	4	5	4	5	5	1	0	4666667	2	6	11	100
12	0	21	20	5	17	28	1.16667	1	2	1	1	1	1	4.6	5	5	4	4	2	5	1	0	4333333	5	6	13	100
12	0	21	21	5	19	28	1	1	1	1	1	1	1	6.8	7	7	6	7	1	3	1	0	1	7	7	10	80
12	0	21	22	6	10	28	4	6	5	5	1	3	4	2.8	3	3	2	3	5	5	0	0	3	2	2	13	100
12	0	21	23	6	12	28	1.66667	3	2	2	1	1	1	3.4	4	3	4	3	4	7	1	0	5333333	3	2	12	100
12	0	21	24	7	8	28	1	1	1	1	1	1	1	4.4	4	4	5	4	4	5	0	0	1666667	3	4	12	100
12	0	21	25	7	10	28	1.16667	1	2	1	1	1	1	4.6	5	6	4	5	1	1	1	1	3666667	2	7	11	100
12	0	21	26	7	13	28	1.33333	1	1	3	1	1	1	3.4	2	2	4	4	4	5	1	1	3	6	2	13	92.3
12	0	21	27	7	15	28	1.5	2	2	2	1	1	1	3.8	3	3	4	4	3	4	1	1	4333333	3	5	12	100
12	0	21	28	7	20	28	1	1	1	1	1	1	1	5	5	5	5	4	3	4	1	0	1	6	5	11	100
13	1	31	1	1	10	23	2.66667	3	1	5	1	2	4	4.2	5	3	5	4	3	3	0	1	2666667	4	1	12	100
13	1	31	2	1	20	23	4.5	5	5	4	3	5	5	1.8	1	1	2	2	5	5	0	0	2666667	2	1	12	100
13	1	31	3	1	21	23	2.83333	3	3	2	1	3	5	4.6	4	4	5	4	2	5	1	0	1333333	6	5	12	100
13	1	31	4	2	11	23	3.5	3	3	4	3	3	5	4.8	4	6	5	6	4	3	0	0	2333333	3	1	13	100
13	1	31	5	2	14	23	2.33333	3	3	2	2	2	2	5.8	7	6	5	6	2	1	1	1	1	7	6	13	100
13	1	31	6	2	16	23	3.16667	3	3	3	4	3	3	4.4	4	5	5	3	3	3	0	1	3666667	5	3	12	100
13	1	31	7	2	17	23	2.33333	2	2	2	3	1	4	6.2	7	6	6	6	2	5	1	1	1666667	6	5	12	100
13	1	31	8	2	19	23	1.66667	2	2	2	1	1	2	5.4	6	5	5	6	2	3	1	0	1	6	1	12	100
13	1	31	9	2	20	23	2	1	2	3	2	2	2	6.4	7	7	6	6	1	2	1	0	1	6	3	12	100
13	1	31	10	3	8	23	2.16667	2	1	5	1	2	2	6.2	7	7	5	6	2	3	1	0	1	6	5	11	90.9
13	1	31	11	3	11	23	2.16667	2	2	3	2	2	2	5.8	6	6	5	6	2	2	0	0	2	6	1	13	100
13	1	31	12	3	15	23	2	2	2	2	2	2	2	6	6	6	6	6	2	2	0	0	2	6	6	12	100
13	1	31	13	3	19	23	3	3	3	5	3	2	2	5.6	4	6	6	6	5	5	0	1	3	5	7	11	90.9
13	1	31	14	3	21	23	2.5	3	2	3	3	2	2	5	5	5	5	5	2	5	0	0	2333333	5		12	91.7
13	1	31	15	4	12	23	1.83333	2	1	2	2	2	2	6	6	6	6	6	2	2	0	0	2	2	1	13	100
13	1	31	16	4	13	23	2	2	2	2	2	2	2	5	5	5	5	5	2	2	0	0	3666667	6	1	13	84.6
13	1	31	17	4	15	23	3.16667	2	2	5	4	3	3	4.6	6	4	5	5	3	5	0	0	3	2	1	13	100
13	1	31	18	5	13	23	3.33333	3	3	5	3	3	3	4.6	3	5	5	5	3	5	0	0	2666667	5	1	12	100
13	1	31	19	5	18	23	4.16667	4	4	6	5	3	3	3.8	4	3	4	5	3	5	0	1	2333333	3	6	12	100
13	1	31	20	5	19	23	3.16667	3	3	2	5	3	3	4.6	5	3	6	4	1	5	0	0	2666667	3	1	13	100
13	1	31	21	5	21	23	2.83333	3	3	3	4	2	2	4.6	5	3	5	5	3	5	0	0	2666667	5	5	12	91.7
13	1	31	22	6	13	23	2.83333	3	2	3	3	2	4	5.4	6	5	5	6	4	3	0	0	2333333	5	3	14	92.9
13	1	31	23	6	15	23	2.16667	2	2	2	3	2	2	5	5	5	5	5	2	3	0	0	1333333	6	1	13	100
14	0	19	1	1	8	35	1.16667	1	1	1	2	1	1	3.4	3	3	3	4	2	6	0	0	1333333	5	2	11	100
14	0	19	2	1	10	35	1.5	1	2	1	1	1	3	4.6	5	5	5	4	3	2	0	0	2333333	6	3	11	100
14	0	19	3	1	11	35	1	1	1	1	1	1	1	5	6	6	4	5	3	2	1	0	2666667	6	2	13	100
14	0	19	4	1	14	35	1.33333	1	1	3	1	1	1	4.6	6	6	4	3	3	2	1	0	3	5	5	13	92.3
14	0	19	5	1	15	35	1.83333	1	1	5	1	2	1	4	6	6	3	3	2	1	1	0	4666667	5	2	13	100
14	0	19	6	1	18	35	1.66667	1	1	5	1	1	1	5.2	6	6	6	5	2	1	1	0	1	6	5	13	100
14	0	19	7	1	18	35	2.5	2	3	3	1	1	5	4.2	4	3	5	5	1	4	1	1	5666667	7	5	8	100
14	0	19	8	1	20	35	1.16667	1	1	2	1	1	1	5.2	6	6	5	4	2	1	1	0	2	5	2	13	100
14	0	19	9	2	7	35	2.33333	2	1	4	2	2	3	1.8	1	1	3	2	1	7	0	0	3333333	3	5	12	100
14	0	19	10	2	11	35	1.66667	2	2	2	1	2	1	5.2	6	6	5	4	2	2	1	1	5333333	6	5	12	100
14	0	19	11	2	12	35	1.66667	1	5	1	1	1	1	4.2	5	5	5	4	2	2	1	1	4333333	4	6	12	100
14	0	19	12	2	14	35	1.5	1	2	1	1	3	1	5.6	6	5	6	5	2	2	1	1	2333333	5	6	10	90
14	0	19	13	2	18	35	1.16667	1	1	1	1	1	2	4.2	4	4	5	4	2	1	1	1	2	7	3	13	92.3
14	0	19	14	2	20	35	1	1	1	1	1	1	1	5.4	5	6	5	6	1	1	1	0	1	6	1	12	91.7
14	0	19	15	3	11	35	2	1	2	2	2	2	3	5.2	6	5	6	5	3	2	1	1	4666667	5	4	13	100
14	0	19	16	3	14	35	2	2	2	2	2	2	2	3.8	4	4	4	4	2	6	1	1	4666667	5	3	13	100
14	0	19	17	3	16	35	2.16667	1	3	6	1	1	1	4	6	6	1	3	3	3	1	1	3333333	5	6	13	92.3
14	0	19	18	3	19	35	1.83333	1	6	1	1	1	1	5.6	6	6	6	5	3	1	1	1	1	7	3	13	92.3
14	0	19	19	3	21	35	4	6	5	5	2	4	2	2.6	3	3	2	2	6	5	1	1	1666667	2	6	13	100
14	0	19	20	4	10	35	3.66667	4	4	3	3	4	4	3.6	4	4	3	3	3	5	0	0	2333333	3	3	14	100
14	0	19	21	4	11	35	3.33333	3	3	3	3	4	4	4.4	6	5	3	4	3	3	0	0	1666667	5	3	14	92.9
14	0	19	22	4	13	35	2.5	2	5	2	2	2	2	5	5	5	5	5	1	3	0	0	2	5	3	13	100
14	0	19	23	4	16	35	2.33333	3	3	2	2	2	2	5.4	6	6	5	6	2	1	1	1	3	6	3	14	100
14	0	19	24	4	20	35	2.5	3	3	3	2	2	2	4.8	5	4	4	5	2	2	1	0	1333333	6	6	10	100
14	0	19	25	4	22	35	1.66667	2	2	2	2	1	1	4.6	6	6	5	4	1	2	1	0	3	5	3	12	100
14	0	19	26	5	12	35	1.83333	2	2	3	1	2	1	5	6	6	5	5	2	3	1	0	3333333	5	4	12	100
14	0	19	27	5	14	35	1.83333	2	2	2	2	2	1	5	6	4	5	6	1	3	1	0	3333333	5	4	12	100
14	0	19	28	5	15	35	1.66667	2	2	2	1	1	2	5.2	6	5	6	5	2	5	1	0	2333333	6		13	100
14	0	19	29	5	15	35	1.33333	1	2	1	1	2	1	5.6	6	6	6	5	1	4	1	0	1666667	6	4	14	92.9
14	0	19	30	6	8	35	1.83333	2	2	2	2	1	2	3	3	3	2	3	2	6	0	0	2333333	5	3	11	100
14	0	19	31	6	11	35	1.5	2	2	2	1	1	1	3.4	3	3	4	3	1	6	0	1	4666667	4	2	14	100
14	0	19	32	6	11	35	1	1	1	1	1	1	1	3.6	4	4	4	3	1	5	0	1	4	5	2	13	100
14	0	19	33	6	16	35	1.83333	2	3	2	2	1	1	2.6	3	3	2	3	4	7	1	1	6	3	5	13	92.3
14	0	19	34	6	17	35	2.83333	3	3	3	3	3	2	3	3	3	3	3	1	6	1	1	5666667	4	4	12	100
14	0	19	35	6	21	35	2.5	1	2	3	1	6	2	5.4	5	5	5	6	2	4	1	1	1666667	6	3	9	100
15	0	42	1	1	9	43	1	1	1	1	1	1	1	5.8	6	6	5	6	1	2	1	1	1333333	6	5	10	100
15	0	42	2	1	9	43	1	1	1	1	1	1	1	6	6	6	6	6	1	2	1	1	1666667	6	5	11	100
15	0	42	3	1	11	43	1	1	1	1	1	1	1	5.6	6	5	6	5	1	2	1	1	1666667	5	6	11	81.8
15	0	42	4	1	13	43	1	1	1	1	1	1	1	5.6	6	5	5	6	1	3	1	1	1666667	6	7	10	100
15	0	42	5	1	15	43	1	1	1	1	1	1	1	5.2	5	5	5	5	1	4	1	1	2666667	5	5	12	100
15	0	42	6	1	17	43	1	1	1	1	1	1	1	5.8	6	5	6	6	1	4	1	1	1333333	3	6	12	91.7
15	0	42	7	1	18	43	1	1	1	1	1	1	1	5.4	5	5	6	5	1	4	0	0	1666667	4	3	11	100
15	0	42	8	1	21	43	1	1	1	1	1	1	1	5	5	4	6	4	1	5	0	0	1	6	3	11	100
15	0	42	9	2	8	43	1	1	1	1	1	1	1	6	6	6	6	6	1	5	1	1	2666667	6	2	11	100
15	0	42	10	2	10	43	1	1	1	1	1	1	1	5.8	5	6	6	7	1	5	1	1	1333333	4	6	12	100
15	0	42	11	2	12	43	1	1	1	1	1	1	1	6	6	6	6	7	1	3	1	1	1666667	7	6	12	100
15	0	42	12	2	13	43	1	1	1	1	1	1	1	5.8	6	6	6	6	1	3	1	1	3	6	2	12	100
15	0	42	13	2	16	43	1	1	1	1	1	1	1	6.6	7	7	6	7	1	3	0	1	2666667	6	4	11	100
15	0	42	14	2	17	43	1	1	1	1	1	1	1	6.2	6	6	6	6	1	4	0	0	2	6	2	11	100
15	0	42	15	2	18	43	1	1	1	1	1	1	1	6.2	7	6	6	5	1	5	0	0	3333333	5	1	13	100
15	0	42	16	2	21	43	1	1	1	1	1	1	1	5.8	6	5	6	5	1	5	0	0	1	5	2	12	100
15	0	42	17	3	9	43	1	1	1	1	1	1	1	5.6	5	6	6	5	1	3	1	1	2	6	2	13	100
15	0	42	18	3	10	43	1	1	1	1	1	1	1	5.6	6	5	5	6	1	3	1	1	2	6	7	10	100
15	0	42	19	3	12	43	1	1	1	1	1	1	1	5.6	6	5	6	5	1	3	1	1	2666667	6	1	12	100
15	0	42	20	3	13	43	1	1	1	1	1	1	1	5.4	5	5	6	5	1	5	1	1	2666667	6	3	13	100
15	0	42	21	3	16	43	1	1	1	1	1	1	1	5.6	6	4	7	5	1	3	1	1	2333333	5	5	12	100
15	0	42	22	3	18	43	1	1	1	1	1	1	1	6.8	7	7	7	7	1	2	0	1	2	6	2	12	91.7
15	0	42	23	3	19	43	1	1	1	1	1	1	1	6.4	7	6	6	7	1	3	1	1	1	6	6	11	100
15	0	42	24	3	21	43	1	1	1	1	1	1	1	6.8	7	7	7	7	1	2	1	1	1	6	6	12	91.7
15	0	42	25	4	13	43	1	1	1	1	1	1	1	5.8	6	5	6	5	1	4	1	0	2	5	2	13	92.3
15	0	42	26	4	14	43	1	1	1	1	1	1	1	5.8	6	5	6	5	1	3	1	0	1666667	4	4	12	100
15	0	42	27	4	15	43	1	1	1	1	1	1	1	5.6	6	5	6	5	1	4	1	0	1666667	5	4	11	100
15	0	42	28	4	17	43	1	1	1	1	1	1	1	5	5	5	5	4	1	4	1	0	2333333	4	4	12	91.7
15	0	42	29	4	20	43	1	1	1	1	1	1	1	5.4	5	5	6	5	1	4	1	0	1666667	4	2	12	100
15	0	42	30	4	20	43	1	1	1	1	1	1	1	5	5	5	5	5	1	4	1	0	2	4	4	13	84.6
15	0	42	31	5	8	43	1	1	1	1	1	1	1	5.8	6	5	6	5	1	3	1	0	2666667	4	4	11	100
15	0	42	32	5	12	43	1	1	1	1	1	1	1	6.2	7	6	6	6	1	2	0	1	2666667	4	1	13	100
15	0	42	33	5	14	43	1	1	1	1	1	1	1	6.2	6	6	6	6	1	2	1	1	1666667	6	7	12	100
15	0	42	34	5	15	43	1	1	1	1	1	1	1	6	7	6	6	5	1	1	1	0	1666667	6	2	12	100
15	0	42	35	5	17	43	1	1	1	1	1	1	1	5.6	6	5	6	5	1	2	1	0	1666667	6	2	13	100
15	0	42	36	5	22	43	1	1	1	1	1	1	1	5.4	6	4	6	5	1	4	0	0	1666667	4		13	100
15	0	42	37	5	22	43	1	1	1	1	1	1	1	5.8	6	5	7	5	1	4	0	0	2	6	3	12	100
15	0	42	38	6	8	43	1.33333	1	1	3	1	1	1	4.4	5	3	5	5	1	6	1	1	3	4	3	13	100
15	0	42	39	6	12	43	1	1	1	1	1	1	1	5.8	6	5	6	6	1	6	1	1	3	4	2	12	100
15	0	42	40	6	14	43	1	1	1	1	1	1	1	5.6	6	6	5	5	1	5	1	1	2	6	5	12	100
15	0	42	41	6	15	43	1	1	1	1	1	1	1	5.8	6	5	6	6	1	5	1	1	2333333	5	5	12	100
15	0	42	42	6	16	43	1	1	1	1	1	1	1	5.4	6	4	6	5	1	5	0	0	2666667	4	1	11	100
15	0	42	43	6	20	43	1.16667	1	1	2	1	1	1	5	5	5	5	5	1	6	0	0	4666667	5	1	13	100
16	1	24	1	1	12	21	2.83333	5	2	3	5	1	1	3.8	5	3	2	3	3	5	0	0	2333333	3	2	12	100
16	1	24	2	1	19	21	1.83333	3	2	2	2	1	1	5.8	5	6	6	7	1	4	1	1	2	7	1	12	100
16	1	24	3	2	7	21	2	2	1	5	2	1	1	3.2	5	2	3	3	3	6	1	0	2333333	4	2	13	100
16	1	24	4	2	19	21	1.33333	1	2	1	2	1	1	5.4	6	5	5	6	1	5	1	0	2333333	6	3	12	100
16	1	24	5	2	21	21	1.66667	2	2	2	2	1	1	5.2	5	5	5	6	1	5	1	0	2	6		12	91.7
16	1	24	6	2	22	21	1.33333	2	2	1	1	1	1	5.6	5	6	5	6	2	5	1	0	1666667	5	2	13	100
16	1	24	7	3	13	21	1.5	1	2	1	3	1	1	5	5	5	4	5	1	5	1	1	3333333	4	1	12	91.7
16	1	24	8	3	15	21	1.16667	1	2	1	1	1	1	5.6	6	6	5	6	1	5	1	1	2666667	4	3	13	100
16	1	24	9	3	16	21	1.5	2	1	1	3	1	1	6	7	6	6	5	1	5	0	0	1666667	6	3	13	100
16	1	24	10	3	21	21	1.33333	1	1	2	2	1	1	5.4	6	5	5	6	1	6	1	0	2666667	6		13	100
16	1	24	11	3	21	21	1.66667	1	2	1	4	1	1	5.8	6	5	6	6	1	5	0	0	2333333	5	2	13	100
16	1	24	12	4	11	21	1.33333	1	1	1	3	1	1	6	6	5	7	6	1	5	0	0	2	6	2	12	91.7
16	1	24	13	4	16	21	1.33333	1	2	1	2	1	1	5.8	6	5	6	6	1	6	1	0	2	6	1	14	100
16	1	24	14	4	21	21	1.16667	1	1	2	1	1	1	5.4	5	5	5	6	1	4	1	0	2	6	2	14	100
16	1	24	15	5	8	21	1.16667	1	1	2	1	1	1	5.2	5	5	5	5	1	5	1	0	1666667	6	2	13	100
16	1	24	16	5	14	21	1	1	1	1	1	1	1	5.4	6	5	5	6	1	4	1	0	1333333	2	1	14	92.9
16	1	24	17	5	22	21	1	1	1	1	1	1	1	6.2	6	6	5	7	1	5	1	0	2	3	1	14	100
16	1	24	18	6	12	21	2	2	1	5	2	1	1	4	5	3	3	4	1	6	0	0	4	1	1	14	100
16	1	24	19	6	15	21	2.16667	3	1	6	1	1	1	4	4	3	4	4	1	5	0	0	4666667	2	1	14	100
16	1	24	20	6	17	21	2.83333	3	1	6	5	1	1	3.6	4	3	4	3	1	5	0	0	4666667	1	4	14	100
16	1	24	21	6	21	21	1	1	1	1	1	1	1	4.8	5	3	5	5	1	5	1	0	2333333	4	3	14	100
17	0	21	1	1	8	25	2	4	1	3	2	1	1	3.4	3	2	5	3	1	5	1	1	2333333	4	1	12	100
17	0	21	2	1	12	25	1.16667	1	1	1	2	1	1	4.8	5	5	5	4	1	5	1	1	3333333	5	4	12	100
17	0	21	3	1	13	25	1.66667	2	2	2	2	1	1	4	4	3	5	4	1	5	1	1	4	3	4	13	100
17	0	21	4	1	17	25	1.16667	1	1	1	2	1	1	4.8	5	5	5	4	1	5	1	1	2333333	5	4	12	100
17	0	21	5	1	19	25	1.5	3	1	2	1	1	1	4	5	3	4	3	1	5	1	0	1333333	5	4	13	100
17	0	21	6	2	9	25	1.66667	3	1	3	1	1	1	3.4	3	3	4	3	1	5	0	1	3	1	3	13	100
17	0	21	7	2	9	25	1.5	3	1	2	1	1	1	3.6	4	3	4	3	1	5	0	1	2333333	4	1	13	100
17	0	21	8	2	12	25	1.33333	3	1	1	1	1	1	4.2	5	4	4	3	1	5	1	1	1666667	4	5	13	92.3
17	0	21	9	2	13	25	1	1	1	1	1	1	1	3.8	4	4	4	3	1	5	0	0	4666667	3	1	13	92.3
17	0	21	10	2	16	25	1.16667	1	1	1	2	1	1	4	4	3	5	3	1	4	0	0	1666667	4	1	13	100
17	0	21	11	2	19	25	1.66667	4	1	2	1	1	1	3.4	3	3	4	3	1	5	0	0	1333333	4	1	13	100
17	0	21	12	2	21	25	1.33333	3	1	1	1	1	1	4.4	5	3	5	3	1	5	1	0	1	6	1	13	100
17	0	21	13	3	15	25	1.33333	3	1	1	1	1	1	2.8	4	2	3	1	1	6	1	1	5	2	4	13	100
17	0	21	14	3	17	25	1.66667	4	2	1	1	1	1	3.2	3	3	3	3	1	6	1	1	2333333	4	1	12	91.7
17	0	21	15	3	20	25	1.5	3	1	1	2	1	1	3.6	4	3	4	2	1	4	0	0	1	3	5	13	100
17	0	21	16	4	8	25	1.16667	2	1	1	1	1	1	2.8	3	2	4	1	1	4	1	1	3666667	5	5	13	100
17	0	21	17	4	14	25	1.33333	1	1	3	1	1	1	2.6	3	3	3	1	1	2	1	1	4333333	5	6	13	100
17	0	21	18	5	9	25	1	1	1	1	1	1	1	3.6	4	2	4	3	1	5	0	0	1666667	5	1	14	85.7
17	0	21	19	5	10	25	1	1	1	1	1	1	1	3.6	4	3	4	2	1	3	0	0	4666667	5	1	13	92.3
17	0	21	20	5	13	25	1	1	1	1	1	1	1	3.8	4	4	4	2	1	4	0	0	5333333	5	1	13	100
17	0	21	21	5	15	25	1	1	1	1	1	1	1	3.2	5	3	3	1	1	3	0	0	5666667	5	1	14	100
17	0	21	22	5	17	25	1	1	1	1	1	1	1	3.8	5	3	5	1	1	4	0	0	4666667	5	1	14	100
17	0	21	23	6	11	25	1	1	1	1	1	1	1	3.6	4	3	4	3	1	4	0	1	2333333	5	5	14	92.9
17	0	21	24	6	12	25	2.5	4	2	5	2	1	1	2.8	3	3	3	2	3	4	0	1	3666667	3	3	12	100
17	0	21	25	6	19	25	1	1	1	1	1	1	1	3.4	4	3	4	2	1	5	1	1	3	3	6	14	100
18	0	19	1	1	9	40	2.16667	2	2	3	1	4	1	5.2	6	5	5	6	4	4	1	1	2	5	5	11	100
18	0	19	2	1	12	40	2.16667	2	2	2	3	2	2	5.2	5	5	6	5	3	4	1	1	1666667	4	5	10	100
18	0	19	3	1	14	40	2.83333	3	4	4	2	2	2	3.4	3	3	4	3	3	4	1	1	4333333	4	3	11	100
18	0	19	4	1	16	40	1.5	1	2	2	1	2	1	4	4	3	5	5	2	4	1	1	4333333	3	3	11	100
18	0	19	5	1	17	40	2.66667	3	2	5	2	3	1	3	3	3	3	3	4	4	1	1	5666667	4	5	9	100
18	0	19	6	1	19	40	1.83333	2	2	2	2	2	1	4.8	5	4	5	5	3	4	1	1	2333333	4	5	12	100
18	0	19	7	1	22	40	1.83333	2	2	2	2	2	1	4.6	5	3	5	5	4	4	1	1	2666667	5	3	11	100
18	0	19	8	2	8	40	2.33333	2	2	5	2	2	1	4	5	4	4	3	5	4	1	1	5333333	5	5	12	100
18	0	19	9	2	10	40	2.66667	4	2	3	2	3	2	4.2	3	4	5	4	5	4	1	1	4666667	3	3	12	100
18	0	19	10	2	12	40	2.16667	2	2	2	3	2	2	4.4	5	3	5	4	3	5	1	0	2	3	5	12	100
18	0	19	11	2	14	40	2.16667	2	2	2	3	2	2	4.4	4	3	5	4	5	5	0	0	2666667	5	2	13	100
18	0	19	12	2	17	40	1.5	1	2	1	2	2	1	5.6	6	6	6	5	3	2	1	1	3333333	5	2	14	100
18	0	19	13	2	20	40	1.83333	2	1	2	1	2	3	5.6	6	6	6	5	3	2	1	1	2	5	5	10	100
18	0	19	14	2	21	40	1.16667	1	1	1	1	2	1	5.4	6	6	5	5	2	3	1	1	2	5	6	11	90.9
18	0	19	15	3	9	40	2	2	2	2	2	2	2	4	3	3	5	4	3	6	1	1	2333333	3	5	10	100
18	0	19	16	3	10	40	1.5	2	1	2	1	2	1	4	3	3	5	5	3	5	1	1	2333333	4	3	12	91.7
18	0	19	17	3	11	40	1.66667	2	2	2	2	1	1	5.2	5	5	6	5	2	4	1	1	4333333	4	3	13	100
18	0	19	18	3	13	40	1.5	2	2	1	1	2	1	4.8	5	5	5	4	4	4	1	1	3333333	5	3	14	100
18	0	19	19	3	16	40	2.33333	2	2	2	3	2	3	4.6	5	5	5	4	5	4	1	1	4333333	3	4	13	92.3
18	0	19	20	3	18	40	2	2	2	2	2	2	2	5.2	5	5	6	5	3	4	1	1	3	3	6	10	100
18	0	19	21	3	21	40	1.66667	2	2	1	1	2	2	5.6	5	6	6	6	2	4	1	1	2	3		13	100
18	0	19	22	3	21	40	1.83333	2	2	1	2	2	2	5.6	6	6	5	6	3	3	1	1	2	6	4	13	84.6
18	0	19	23	4	9	40	2	1	2	3	2	2	2	4	4	3	5	4	3	5	0	1	2	4	3	13	84.6
18	0	19	24	4	10	40	2	2	2	1	3	2	2	4.6	5	4	5	4	3	4	0	1	2333333	3	3	11	100
18	0	19	25	4	12	40	2.33333	3	3	2	2	2	2	4.4	5	4	5	4	2	4	0	1	3	4	3	12	100
18	0	19	26	4	13	40	2.16667	2	2	2	2	2	3	4.2	5	4	5	5	5	3	0	1	3333333	1	4	13	100
18	0	19	27	4	17	40	1.66667	2	1	2	2	2	1	4.8	5	4	5	5	3	4	1	1	2333333	4	3	14	92.9
18	0	19	28	4	20	40	2.16667	3	2	2	3	2	1	4.8	6	4	5	4	4	4	0	0	1333333	4	2	13	100
18	0	19	29	4	21	40	3.83333	5	2	4	5	4	3	3.4	4	3	4	3	6	5	0	0	5	4	4	13	84.6
18	0	19	30	5	8	40	2.16667	2	1	2	3	2	3	4.2	4	3	5	5	4	5	1	1	4666667	5	3	13	100
18	0	19	31	5	13	40	3.33333	5	5	5	2	2	1	4.8	5	5	5	4	3	4	1	1	2333333	3	6	13	100
18	0	19	32	5	14	40	1.5	1	2	2	2	1	1	4	5	4	5	3	4	4	1	1	2666667	4	6	10	90
18	0	19	33	5	19	40	1.83333	2	2	2	2	2	1	4	5	3	4	4	3	5	1	1	3666667	5	2	13	100
18	0	19	34	5	22	40	2	2	2	2	3	2	1	5	5	5	5	4	3	5	1	0	2333333	5		13	100
18	0	19	35	5	22	40	2	3	2	2	2	2	1	5	6	5	5	4	5	3	1	1	4666667	3	6	14	100
18	0	19	36	6	8	40	3	2	3	5	4	2	2	3.4	3	3	4	3	3	5	0	0	2	4	6	11	90.9
18	0	19	37	6	11	40	2.5	3	3	2	2	2	3	4	5	4	4	3	5	5	1	1	3333333	4	3	14	100
18	0	19	38	6	18	40	2	2	2	2	2	2	2	4.8	5	5	5	5	4	2	0	0	3333333	5	2	14	92.9
18	0	19	39	6	18	40	1.66667	2	2	1	2	2	1	4.6	5	5	5	5	2	4	1	1	2666667	5	6	12	100
18	0	19	40	6	21	40	1.66667	1	2	2	2	2	1	5	5	5	5	5	3	5	1	1	2333333	5	5	14	100
19	0	19	1	1	8	34	2	4	2	2	2	1	1	4.2	5	3	4	4	5	4	0	0	2333333	4	1	11	100
19	0	19	2	1	11	34	1.5	2	2	1	1	2	1	4.6	4	5	4	5	4	2	1	1	4	4	4	10	90
19	0	19	3	1	13	34	2.5	4	2	4	3	1	1	3.8	4	4	4	3	5	5	0	0	4333333	4	1	13	100
19	0	19	4	1	16	34	2.33333	4	2	2	3	2	1	3.8	4	4	4	4	5	4	0	0	4	4	5	11	100
19	0	19	5	1	18	34	1.66667	2	2	2	2	1	1	4.2	5	4	4	4	3	3	1	1	3	4	5	12	100
19	0	19	6	1	20	34	1.83333	1	2	2	3	2	1	3.6	5	3	4	4	2	4	1	1	3666667	2	3	12	100
19	0	19	7	2	8	34	2.16667	5	1	4	1	1	1	3.4	4	3	4	3	2	5	0	0	1333333	4	1	11	100
19	0	19	8	2	9	34	1.5	3	1	2	1	1	1	4.8	5	5	4	5	3	4	1	0	2	2	3	12	100
19	0	19	9	2	16	34	1	1	1	1	1	1	1	5.2	5	5	5	5	3	2	0	0	2666667	5	1	13	100
19	0	19	10	2	17	34	1	1	1	1	1	1	1	5.6	5	5	6	6	2	3	0	0	1333333	4	2	13	100
19	0	19	11	2	19	34	1	1	1	1	1	1	1	5.2	5	5	6	5	2	2	0	0	3	5	1	13	100
19	0	19	12	3	8	34	1	1	1	1	1	1	1	3.6	3	3	4	3	2	5	0	0	2333333	5	2	11	90.9
19	0	19	13	3	11	34	1	1	1	1	1	1	1	4	5	4	5	3	4	4	1	1	3333333	4	6	9	100
19	0	19	14	3	11	34	1	1	1	1	1	1	1	4	5	4	3	4	1	3	1	1	4333333	5	4	12	91.7
19	0	19	15	3	16	34	1	1	1	1	1	1	1	4.6	5	5	4	5	2	4	1	1	3666667	5	1	13	92.3
19	0	19	16	3	18	34	1	1	1	1	1	1	1	4.4	7	4	4	3	1	4	1	0	1666667	4	1	14	92.9
19	0	19	17	3	21	34	7	7	7	7	7	7	7	3	1	4	2	7	6	6	1	1	1	1	1	14	28.6
19	0	19	18	4	9	34	1.16667	1	1	1	2	1	1	4.2	3	3	4	5	2	6	0	0	2	3	3	9	66.7
19	0	19	19	4	9	34	1	1	1	1	1	1	1	4.4	5	4	4	3	2	4	0	0	1333333	5	1	12	91.7
19	0	19	20	4	16	34	1	1	1	1	1	1	1	4.2	5	4	4	4	5	4	1	1	4	5	1	13	100
19	0	19	21	4	21	34	1.83333	3	1	4	1	1	1	3.2	4	2	4	3	4	4	0	0	3	4	2	13	92.3
19	0	19	22	5	8	34	1	1	1	1	1	1	1	4.2	4	3	4	5	4	5	1	1	3	4	4	12	91.7
19	0	19	23	5	9	34	1	1	1	1	1	1	1	4	4	3	4	4	6	4	1	1	3333333	5	4	13	100
19	0	19	24	5	12	34	1	1	1	1	1	1	1	4.2	5	3	5	4	4	5	1	1	3666667	4	5	12	91.7
19	0	19	25	5	13	34	1	1	1	1	1	1	1	3.4	3	3	4	3	5	3	0	1	4333333	5	1	13	100
19	0	19	26	5	15	34	1	1	1	1	1	1	1	3.2	4	4	1	4	4	5	1	1	4333333	4	1	13	100
19	0	19	27	5	18	34	1	1	1	1	1	1	1	3	3	3	3	3	5	6	1	1	4666667	3	2	13	100
19	0	19	28	5	22	34	1	1	1	1	1	1	1	3.8	3	3	4	3	3	4	0	0	1333333	4	1	11	90.9
19	0	19	29	6	13	34	1.5	2	1	3	1	1	1	3.8	5	3	4	4	5	4	0	0	3333333	4	4	11	100
19	0	19	30	6	13	34	2	3	1	5	1	1	1	3.2	3	3	3	2	5	4	0	0	3666667	4	4	13	92.3
19	0	19	31	6	15	34	1.5	1	4	1	1	1	1	4	4	5	3	4	3	4	0	0	3	4	1	14	100
19	0	19	32	6	17	34	1.33333	2	1	1	1	2	1	4	4	4	4	3	3	4	0	0	3333333	4	5	13	100
19	0	19	33	6	18	34	1	1	1	1	1	1	1	4.6	4	4	4	4	4	6	0	0	3	4	1	13	100
19	0	19	34	6	22	34	1.33333	3	1	1	1	1	1	4.6	4	3	4	5	3	5	0	0	1666667	5	1	12	91.7
20	1	58	1	2	8	32	2.5	3	2	2	2	1	5	5.8	6	6	6	5	5	3	0	0	3333333	5	3	4	100
20	1	58	2	2	9	32	1.5	1	2	2	2	1	1	6.4	6	6	6	7	2	2	0	0	1	6	2	11	90.9
20	1	58	3	2	11	32	1.33333	1	2	2	1	1	1	6.4	6	7	6	7	3	2	0	1	2333333	6	2	10	90
20	1	58	4	2	14	32	1.83333	2	2	2	2	1	2	6.6	6	7	6	7	2	1	0	1	1333333	7	5	11	81.8
20	1	58	5	2	16	32	1	1	1	1	1	1	1	6.4	7	6	6	6	2	1	1	1	1333333	7	2	10	100
20	1	58	6	2	18	32	1.16667	2	1	1	1	1	1	6.4	7	6	6	6	3	1	1	0	1666667	6	4	10	100
20	1	58	7	3	10	32	1.33333	1	2	2	1	1	1	6.4	6	6	7	6	2	2	1	0	1333333	7	2	11	100
20	1	58	8	3	13	32	2	2	1	6	1	1	1	6.8	7	7	7	6	3	2	0	1	2	6	3	11	100
20	1	58	9	3	16	32	1.16667	1	1	2	1	1	1	5.6	6	6	2	7	3	1	1	0	1333333	7	2	11	100
20	1	58	10	3	17	32	1.16667	1	1	1	1	1	2	6.8	7	7	7	7	3	2	1	0	1333333	7	1	12	100
20	1	58	11	3	19	32	1.33333	1	2	2	1	1	1	6.4	6	7	6	7	2	2	1	0	2	6	3	11	100
20	1	58	12	3	20	32	1.16667	1	1	2	1	1	1	6.4	7	6	6	7	2	2	1	0	3333333	7	3	11	90.9
20	1	58	13	4	8	32	1.16667	2	1	1	1	1	1	5.4	5	5	6	5	1	3	1	0	1333333	6	2	9	100
20	1	58	14	4	9	32	2	2	1	6	1	1	1	6.4	6	6	7	6	2	3	0	0	5	6	2	11	100
20	1	58	15	4	11	32	3.16667	4	4	4	5	1	1	4.2	5	5	5	3	4	2	0	1	2666667	5	2	12	100
20	1	58	16	4	13	32	1.5	1	2	2	2	1	1	5.8	6	6	6	5	3	2	0	0	2	6	3	11	90.9
20	1	58	17	4	16	32	1.33333	1	1	2	2	1	1	6.6	6	7	7	6	2	3	1	1	2	6	2	11	100
20	1	58	18	4	21	32	2	6	1	2	1	1	1	6.2	6	6	7	6	2	3	1	0	2	6	3	11	100
20	1	58	19	5	7	32	2	2	2	4	2	1	1	5	5	5	4	6	4	5	0	1	2333333	6	4	10	90
20	1	58	20	5	9	32	2	1	2	6	1	1	1	6.2	6	6	6	7	2	6	1	1	2	6	3	11	100
20	1	58	21	5	21	32	1.33333	2	1	2	1	1	1	6	6	6	6	6	3	3	1	0	2	6
20	1	58	22	5	21	32	1.33333	1	2	2	1	1	1	6.2	6	6	6	6	4	2	1	0	3333333	7	2	12	100
20	1	58	23	6	7	32	1.33333	2	2	1	1	1	1	5	5	5	5	5	2	3	1	0	1666667	6	2	10	90
20	1	58	24	6	11	32	1.33333	1	2	2	1	1	1	6.4	6	6	6	7	2	2	1	1	2	6	2	12	100
20	1	58	25	6	14	32	1.16667	1	2	1	1	1	1	6.2	6	6	6	6	2	3	1	1	2	6	3	11	100
20	1	58	26	6	17	32	1.33333	1	2	1	2	1	1	6.2	6	6	7	6	3	3	1	1	2	6	2	10	100
20	1	58	27	6	20	32	3.33333	2	7	2	7	1	1	5.2	6	2	6	6	2	2	1	0	2	6	2	12	100
20	1	58	28	6	21	32	1.33333	1	2	2	1	1	1	6.4	6	6	6	7	1	2	1	0	2	6	2	11	100
20	1	58	29	7	10	32	1.66667	2	3	2	1	1	1	5.4	5	5	6	5	4	3	1	1	2	6	4	11	100
20	1	58	30	7	15	32	1.66667	1	4	1	2	1	1	5.4	4	6	5	6	2	3	1	1	2666667	6	3	11	81.8
20	1	58	31	7	21	32	1.5	2	2	2	1	1	1	6.2	6	6	6	6	2	3	1	0	2	6
20	1	58	32	7	21	32	2.16667	6	2	1	2	1	1	6	6	6	6	6	2	6	1	1	2666667	6	2	9	100
21	1	33	1	1	9	28	2.33333	2	6	2	2	1	1	6.2	6	6	6	7	1	1	0	1	1	7	2	11	100
21	1	33	2	1	11	28	2.16667	7	1	2	1	1	1	7	7	7	7	7	1	2	0	0	4333333	4	3	9	100
21	1	33	3	1	13	28	2	1	1	6	1	2	1	6	7	7	5	7	4	2	1	1	1666667	2	4	11	100
21	1	33	4	1	19	28	3.33333	2	6	2	6	2	2	6	6	6	6	6	2	1	1	0	1333333	7	4	8	100
21	1	33	5	2	14	28	3	3	4	5	2	2	2	4.2	4	4	5	4	4	5	1	1	4	5	7	6	100
21	1	33	6	2	15	28	1.83333	2	2	4	1	1	1	4	3	5	3	4	4	1	1	0	4333333	4	2	7	100
21	1	33	7	2	18	28	2.5	2	2	6	1	2	2	5	4	5	4	5	2	2	1	0	3666667	5
21	1	33	8	2	18	28	1.66667	2	2	3	1	1	1	4.6	4	5	5	4	1	2	0	1	3	6	2	7	100
21	1	33	9	2	21	28	2	2	2	3	2	2	1	4.4	5	4	4	4	1	2	1	0	3333333	4
21	1	33	10	3	10	28	1.5	1	2	3	1	1	1	5	5	5	5	5	2	2	1	0	4	4	2	8	100
21	1	33	11	3	16	28	1.16667	1	2	1	1	1	1	6	6	6	6	6	1	1	1	1	1	1	5	8	100
21	1	33	12	3	18	28	1.5	1	1	4	1	1	1	3.4	3	3	3	4	2	1	1	0	4	4	3	8	75
21	1	33	13	3	19	28	2	2	1	4	2	2	1	3.4	3	3	4	3	3	1	1	1	2666667	5	4	8	87.5
21	1	33	14	3	21	28	2.33333	2	2	5	2	2	1	2	2	2	2	2	2	2	1	0	4333333	5
21	1	33	15	4	11	28	2.16667	2	2	4	2	2	1	4	4	4	4	4	4	1	0	1	4	4	5	7	71.4
21	1	33	16	4	11	28	2.33333	2	2	4	2	2	2	3.6	4	4	2	4	2	2	1	1	4	4	3	7	100
21	1	33	17	4	15	28	1.33333	1	1	3	1	1	1	4	4	4	4	4	4	2	1	1	2666667	5	5	8	75
21	1	33	18	4	19	28	1.5	1	1	4	1	1	1	4.6	5	5	4	4	3	1	1	0	3333333	5	3	7	100
21	1	33	19	4	21	28	1.66667	1	2	4	1	1	1	4	4	4	4	4	3	2	1	1	4	4	3	8	100
21	1	33	20	5	9	28	2.33333	2	2	4	2	2	2	4	4	4	4	4	4	2	1	1	3	5	4	7	100
21	1	33	21	5	11	28	1.5	2	1	3	1	1	1	4	4	4	4	4	4	2	1	1	2666667	4	3	6	100
21	1	33	22	5	20	28	1	1	1	1	1	1	1	5	5	5	5	5	4	1	1	0	3333333	3	3	8	100
21	1	33	23	6	7	28	1.66667	1	1	2	2	2	2	4	4	4	4	4	4	2	1	1	3333333	4	3	8	100
21	1	33	24	6	10	28	1.66667	1	2	4	1	1	1	3.8	3	4	4	4	4	1	1	0	3	5	3	8	100
21	1	33	25	6	11	28	2.16667	2	2	3	2	2	2	3.6	4	4	2	4	4	1	1	1	3333333	5	3	7	100
21	1	33	26	6	14	28	2.33333	5	5	1	1	1	1	4.2	5	5	5	5	2	1	1	1	3	4	4	7	71.4
21	1	33	27	6	18	28	2	2	2	4	1	2	1	4.8	5	5	4	5	4	1	1	0	3333333	4	4	8	100
21	1	33	28	6	21	28	2	2	3	2	2	2	1	4.6	6	6	6	2	3	2	0	0	2	5	3	9	100
22	0	21	1	1	9	27	2.66667	3	2	3	3	3	2	4.2	5	3	5	3	4	5	0	0	2	5	2	10	100
22	0	21	2	1	11	27	2.66667	3	2	2	4	3	2	4.6	5	5	5	3	3	4	0	1	4	5	2	13	100
22	0	21	3	1	14	27	3.5	4	5	3	3	4	2	4	5	5	4	3	5	3	1	1	4333333	6	1	13	100
22	0	21	4	1	15	27	3.16667	4	5	2	3	4	1	3.6	4	3	4	4	5	5	1	1	4333333	2	2	13	100
22	0	21	5	1	18	27	3.66667	5	2	5	2	3	5	3.8	4	4	4	4	4	5	1	0	3666667	3	1	13	100
22	0	21	6	1	18	27	2.5	4	2	3	2	2	2	4.2	5	3	4	4	3	5	1	0	2666667	4	1	13	100
22	0	21	7	1	21	27	2.33333	2	2	3	3	2	2	4.8	5	4	5	5	4	5	1	0	3	4	4	12	100
22	0	21	8	2	10	27	3.16667	3	3	2	5	5	1	4.4	5	5	4	4	5	5	0	0	3	3	2	10	90
22	0	21	9	2	12	27	3.16667	3	5	2	2	6	1	3.6	3	5	4	4	6	3	1	1	1666667	4	1	13	100
22	0	21	10	2	20	27	2	2	2	1	1	4	2	5.4	5	6	5	6	3	4	1	1	1666667	6	3	13	92.3
22	0	21	11	2	22	27	1.66667	2	2	2	1	2	1	5.6	6	6	5	6	2	3	1	1	1666667	5	6	13	84.6
22	0	21	12	3	12	27	2.83333	5	3	3	2	3	1	4.8	5	6	4	5	4	5	0	1	2666667	4	7	12	100
22	0	21	13	3	19	27	1.83333	2	2	2	2	2	1	5.2	5	4	6	5	3	5	1	0	2	4	3	12	100
22	0	21	14	3	21	27	3.5	6	3	2	6	3	1	5	4	5	5	4	3	4	0	1	1666667	1	1	14	100
22	0	21	15	4	9	27	4.16667	6	3	3	6	5	2	3.6	5	4	3	3	5	5	0	0	2666667	2	2	10	90
22	0	21	16	4	10	27	3	4	3	2	4	4	1	4.2	5	5	4	4	5	5	0	0	2666667	4	2	13	92.3
22	0	21	17	4	13	27	2.33333	3	2	3	3	2	1	5.4	6	5	5	5	3	3	0	0	3	4	2	13	100
22	0	21	18	4	18	27	3	5	3	2	5	2	1	5.2	5	5	5	5	4	3	1	1	4	4	1	14	100
22	0	21	19	4	19	27	2.33333	3	2	2	4	2	1	5.2	5	5	6	5	5	4	1	0	2	4	2	13	100
22	0	21	20	4	21	27	1.83333	2	1	2	2	3	1	5.6	6	5	6	5	3	4	1	0	2	5	1	14	100
22	0	21	21	5	13	27	2	3	3	2	2	1	1	5.2	5	6	5	6	5	3	1	1	3	4	2	13	100
22	0	21	22	5	15	27	1.66667	2	2	2	2	1	1	4.6	5	5	5	4	4	4	1	1	2666667	6	3	13	92.3
22	0	21	23	5	18	27	2	3	3	2	2	1	1	4.8	5	5	5	4	4	4	1	0	2	4	3	13	100
22	0	21	24	5	20	27	1.83333	2	2	2	2	2	1	5.6	6	6	5	6	3	4	1	1	2	7	5	14	100
22	0	21	25	5	20	27	1.66667	1	2	2	2	2	1	5.8	6	6	6	6	2	3	1	1	1666667	6	5	13	100
22	0	21	26	6	9	27	2	2	3	3	2	1	1	4.4	6	3	4	4	4	5	0	0	2333333	4	4	11	90.9
22	0	21	27	6	17	27	2	2	2	2	2	2	2	5.6	6	6	5	6	3	3	1	1	2666667	5	4	13	100
23	0	22	1	1	9	34	1.83333	1	4	1	2	2	1	4.8	5	5	5	5	1	4	0	0	2666667	4	1	11	90.9
23	0	22	2	1	10	34	1.16667	1	2	1	1	1	1	5.2	5	5	6	6	2	3	0	1	3	5	1	11	100
23	0	22	3	1	16	34	1.66667	1	3	2	1	2	1	5	5	6	5	5	1	3	1	1	3666667	6	1	12	100
23	0	22	4	1	17	34	1.33333	2	1	2	1	1	1	4.4	5	5	4	4	2	2	1	0	4	5	3	12	83.3
23	0	22	5	1	18	34	1	1	1	1	1	1	1	5.4	5	5	6	5	3	4	1	0	2333333	4	2	12	83.3
23	0	22	6	1	22	34	2.33333	3	2	1	2	2	4	4.6	5	3	5	4	3	3	1	0	1333333	4	1	13	100
23	0	22	7	2	7	34	2.5	2	1	7	1	2	2	3	2	3	4	4	4	6	1	0	3	3	5	11	54.5
23	0	22	8	2	12	34	1.16667	2	1	1	1	1	1	4.4	4	4	5	4	4	4	1	0	4	5	1	14	100
23	0	22	9	2	13	34	1.33333	1	2	1	1	2	1	4.6	4	5	5	4	2	1	1	0	2666667	3	2	13	92.3
23	0	22	10	2	16	34	1	1	1	1	1	1	1	5.8	6	6	5	6	2	3	1	0	2333333	3	2	14	85.7
23	0	22	11	2	17	34	1.33333	1	1	1	1	2	2	4.4	4	4	5	4	3	3	1	0	2333333	4	5	11	90.9
23	0	22	12	2	19	34	1.16667	1	2	1	1	1	1	5	6	5	4	5	3	4	1	0	2666667	6	2	13	84.6
23	0	22	13	2	20	34	1	1	1	1	1	1	1	4.8	5	4	5	6	3	3	1	0	3	5	3	13	100
23	0	22	14	3	9	34	1	1	1	1	1	1	1	4.8	5	4	6	4	3	3	1	0	2666667	6	4	12	100
23	0	22	15	3	10	34	1.16667	1	1	2	1	1	1	4.2	4	4	5	4	2	4	1	1	2666667	3	1	13	100
23	0	22	16	3	11	34	2.33333	1	3	4	3	2	1	3.6	4	4	4	4	4	3	0	1	5	5	7	10	90
23	0	22	17	3	13	34	2.33333	2	4	4	1	1	2	3.8	4	4	4	4	5	3	1	1	2666667	4	1	13	84.6
23	0	22	18	3	15	34	1.16667	1	2	1	1	1	1	5.2	5	5	6	5	4	4	1	1	2666667	4	4	12	83.3
23	0	22	19	3	17	34	2.16667	1	3	3	2	3	1	4.2	4	4	5	4	4	6	0	0	5333333	4	2	12	100
23	0	22	20	3	19	34	1.33333	1	3	1	1	1	1	4.4	5	4	5	4	4	3	1	0	2	4	1	14	92.9
23	0	22	21	3	20	34	1.16667	1	2	1	1	1	1	4.6	4	5	4	5	1	2	1	0	4666667	5	2	13	92.3
23	0	22	22	4	13	34	1.16667	1	1	1	1	1	2	4.8	5	5	6	2	4	4	1	1	2666667	4	3	14	85.7
23	0	22	23	4	16	34	1	1	1	1	1	1	1	5	5	5	6	4	1	3	0	0	2333333	6	2	12	83.3
23	0	22	24	4	17	34	1.5	1	1	4	1	1	1	3.4	4	4	4	1	2	4	1	0	4333333	4	3	13	84.6
23	0	22	25	4	20	34	1.16667	1	1	2	1	1	1	4	4	3	5	4	3	3	1	0	2333333	4	4	13	92.3
23	0	22	26	5	12	34	1	1	1	1	1	1	1	4.2	4	5	5	2	3	4	1	1	4333333	5	3	13	84.6
23	0	22	27	5	14	34	1	1	1	1	1	1	1	4	5	4	5	2	4	6	1	1	4333333	4	3	13	92.3
23	0	22	28	5	16	34	1	1	1	1	1	1	1	3.4	4	4	4	1	4	5	1	1	4	4	1	12	91.7
23	0	22	29	5	20	34	2.16667	3	3	2	1	2	2	2.6	3	1	4	1	4	7	0	0	5666667	4	2	13	84.6
23	0	22	30	5	21	34	1.83333	1	2	3	1	1	3	3.2	4	2	4	2	4	7	0	0	5666667	4	1	13	100
23	0	22	31	6	13	34	1.33333	1	3	1	1	1	1	3.2	4	2	4	2	2	3	1	1	5333333	4	5	10	100
23	0	22	32	6	17	34	1.16667	1	1	2	1	1	1	3.2	3	4	2	3	3	4	1	1	4333333	4	6	12	83.3
23	0	22	33	6	20	34	1.66667	1	3	1	1	1	3	3.8	6	1	6	2	4	4	1	0	5	2	3	14	85.7
23	0	22	34	6	21	34	1.66667	1	2	3	1	2	1	3.8	3	4	4	4	4	5	1	0	5	4	5	13	92.3
24	0	24	1	1	9	32	1	1	1	1	1	1	1	7	7	7	7	7	1	1	0	0	1	6	1	11	100
24	0	24	2	1	12	32	2	1	7	1	1	1	1	7	7	7	7	7	1	2	1	0	1	7	2	11	90.9
24	0	24	3	1	15	32	1	1	1	1	1	1	1	7	7	7	7	7	1	1	1	0	1	6	4	11	100
24	0	24	4	1	18	32	1	1	1	1	1	1	1	6.2	6	6	6	6	1	4	1	0	1666667	7	1	11	100
24	0	24	5	1	19	32	1	1	1	1	1	1	1	6.6	7	5	7	7	1	4	1	0	1	6	1	11	100
24	0	24	6	1	21	32	1	1	1	1	1	1	1	6.6	7	5	7	7	1	4	0	0	1	7	5	11	90.9
24	0	24	7	2	9	32	1	1	1	1	1	1	1	6.8	7	6	7	7	1	1	1	0	1	7	1	12	100
24	0	24	8	2	9	32	1	1	1	1	1	1	1	6.4	6	5	7	7	1	4	1	0	1	7	3	12	100
24	0	24	9	2	12	32	1	1	1	1	1	1	1	6.4	7	4	7	7	1	1	0	0	1	7	1	12	91.7
24	0	24	10	2	14	32	1	1	1	1	1	1	1	5.6	4	4	7	6	1	6	1	0	1666667	5	1	12	100
24	0	24	11	2	15	32	1	1	1	1	1	1	1	6.8	6	7	7	7	1	2	1	0	1	7	1	12	100
24	0	24	12	2	19	32	1.83333	1	1	3	1	1	4	4.4	5	3	4	5	1	5	1	0	4	5
24	0	24	13	3	10	32	1.16667	1	2	1	1	1	1	5.8	6	6	6	6	1	1	1	1	2	6	1	11	100
24	0	24	14	3	14	32	1.16667	1	2	1	1	1	1	5.8	6	6	6	6	1	3	1	1	2333333	6	1	10	100
24	0	24	15	3	16	32	1	1	1	1	1	1	1	6.8	7	7	7	7	1	1	1	1	2	7	1	10	90
24	0	24	16	3	18	32	1	1	1	1	1	1	1	6.6	6	6	7	7	1	1	1	0	1	7	1	11	90.9
24	0	24	17	3	21	32	1	1	1	1	1	1	1	7	7	7	7	7	1	2	1	0	1	7	1	11	72.7
24	0	24	18	4	8	32	1	1	1	1	1	1	1	7	7	7	7	7	1	1	0	1	1333333	7	1	11	90.9
24	0	24	19	4	13	32	1	1	1	1	1	1	1	6.4	7	7	7	7	1	2	1	1	2666667	6	1	12	91.7
24	0	24	20	4	15	32	1.16667	1	2	1	1	1	1	6.4	6	7	7	7	1	1	1	1	2333333	7	1	12	100
24	0	24	21	4	18	32	1.33333	1	1	3	1	1	1	6.4	7	6	6	7	1	1	0	1	1	7	1	11	100
24	0	24	22	4	20	32	1	1	1	1	1	1	1	6.2	6	4	7	7	1	4	1	1	1	6	1	11	100
24	0	24	23	4	22	32	1	1	1	1	1	1	1	7	7	7	7	7	1	4	1	1	1	7	4	11	100
24	0	24	24	5	8	32	1	1	1	1	1	1	1	6.6	6	6	7	7	1	1	0	0	1	7	1	12	100
24	0	24	25	5	10	32	1	1	1	1	1	1	1	6.6	7	6	7	7	1	3	1	0	1666667	7	1	13	100
24	0	24	26	5	11	32	1	1	1	1	1	1	1	6.8	6	7	7	7	1	4	1	0	1	7	1	11	100
24	0	24	27	5	16	32	1	1	1	1	1	1	1	6.4	6	6	6	7	1	1	1	0	1	7	1	12	100
24	0	24	28	5	17	32	1	1	1	1	1	1	1	5.6	5	3	7	6	1	6	1	0	1	7	1	11	100
24	0	24	29	6	13	32	1	1	1	1	1	1	1	7	7	7	7	7	1	1	1	1	2	6	1	11	100
24	0	24	30	6	19	32	1	1	1	1	1	1	1	7	7	7	7	7	1	1	1	1	2	7	1	10	90
24	0	24	31	6	21	32	1	1	1	1	1	1	1	6.6	7	7	7	7	2	1	1	0	1666667	7
24	0	24	32	6	21	32	1	1	1	1	1	1	1	6.6	7	7	7	7	1	2	1	0	1666667	7	1	13	100
25	0	22	1	1	10	31	1	1	1	1	1	1	1	5.8	6	5	6	5	2	3	0	0	1	6	1	12	100
25	0	22	2	1	12	31	1.16667	1	1	1	2	1	1	4.8	5	5	5	4	2	3	0	0	1	5	3	12	100
25	0	22	3	1	13	31	1.33333	1	1	1	3	1	1	6.4	7	6	6	6	1	2	0	0	1666667	6	2	11	100
25	0	22	4	1	16	31	1.33333	1	1	1	3	1	1	5.8	6	5	6	5	1	4	0	0	1666667	5	3	12	100
25	0	22	5	1	17	31	2.33333	2	3	3	1	2	3	5.2	6	5	5	5	2	4	1	0	2	4	3	13	100
25	0	22	6	1	20	31	1	1	1	1	1	1	1	4.4	5	4	5	4	1	4	1	0	2333333	5	3	12	100
25	0	22	7	1	20	31	1.16667	1	1	2	1	1	1	5.8	6	5	6	5	1	5	1	0	1333333	4	2	12	100
25	0	22	8	2	13	31	1.33333	1	2	1	1	1	2	5.6	6	6	5	6	1	2	1	0	1	7	3	13	92.3
25	0	22	9	2	16	31	1.33333	1	1	1	1	1	3	5.6	6	6	5	5	2	3	1	0	1	5	4	13	100
25	0	22	10	2	18	31	1.5	3	2	1	1	1	1	5	6	5	5	4	3	4	1	0	1	6	3	13	100
25	0	22	11	2	18	31	1	1	1	1	1	1	1	6.4	6	6	7	6	1	4	1	0	1666667	5	2	12	91.7
25	0	22	12	2	21	31	2	3	4	2	1	1	1	4.8	6	5	4	4	2	4	1	0	1	6	3	12	100
25	0	22	13	3	8	31	2.5	3	3	1	1	2	5	4.4	5	4	5	4	3	4	1	0	1666667	4	3	11	100
25	0	22	14	3	14	31	2.66667	1	6	3	1	2	3	5.4	6	6	5	4	3	4	1	1	2	4	2	13	100
25	0	22	15	3	16	31	1.16667	1	1	1	2	1	1	5.6	6	6	6	4	2	5	1	0	4666667	3	1	13	100
25	0	22	16	3	18	31	1	1	1	1	1	1	1	6.2	6	6	6	7	1	4	1	0	1333333	5	2	14	100
25	0	22	17	3	20	31	1	1	1	1	1	1	1	6.2	6	6	6	6	2	5	1	0	1	5	3	13	100
25	0	22	18	5	8	31	1.33333	1	1	1	3	1	1	5.2	5	5	5	5	1	2	0	0	2	5	1	11	100
25	0	22	19	5	10	31	1.16667	1	1	2	1	1	1	4.8	5	6	5	4	1	2	0	1	3666667	5	1	14	100
25	0	22	20	5	14	31	2.66667	3	3	1	1	3	5	4.6	6	5	4	4	4	4	1	1	4333333	4	3	12	100
25	0	22	21	5	18	31	1	1	1	1	1	1	1	6	6	6	6	5	2	5	1	0	2333333	5	3	12	100
25	0	22	22	5	19	31	1.33333	1	3	1	1	1	1	5.6	6	6	5	6	3	5	1	0	1333333	6	1	13	100
25	0	22	23	5	22	31	1.16667	1	1	1	2	1	1	5.2	5	4	5	5	2	5	1	0	1	5	1	12	100
25	0	22	24	6	11	31	1.83333	1	3	3	1	2	1	5	6	5	5	4	3	2	0	0	1666667	4	2	14	100
25	0	22	25	6	17	31	1.5	1	1	2	3	1	1	5.2	6	5	5	4	3	3	0	0	4333333	4	4	13	100
25	0	22	26	6	20	31	1.83333	3	2	3	1	1	1	4.8	6	4	5	4	1	5	1	0	3	5	4	13	100
25	0	22	27	6	20	31	2.66667	5	5	3	1	1	1	3.2	4	1	4	3	4	5	1	0	1	4
25	0	22	28	6	20	31	4.16667	6	5	3	1	5	5	2.8	3	3	2	2	6	5	1	0	1	3	2	13	100
25	0	22	29	7	8	31	1.16667	1	1	2	1	1	1	4.6	6	4	5	4	1	2	1	1	2	4	3	13	100
25	0	22	30	7	10	31	1	1	1	1	1	1	1	6.4	6	6	7	6	1	2	1	1	1666667	6	4	12	100
25	0	22	31	7	13	31	2.16667	3	1	4	1	1	3	5	6	6	4	4	4	3	1	1	1	4	3	13	100
26	0	33	1	2	8	40	1.66667	1	2	2	1	2	2	4.8	5	5	5	4	3	2	0	1	2	6	1	13	92.3
26	0	33	2	2	9	40	1.5	1	2	2	1	1	2	5.2	6	5	5	5	2	2	1	1	2666667	5	2	11	100
26	0	33	3	2	11	40	1.5	1	2	2	1	1	2	4.4	4	5	5	4	2	3	0	1	2666667	5	2	11	100
26	0	33	4	2	14	40	1.5	1	2	2	1	1	2	5.4	6	5	5	6	3	3	1	1	2333333	5	2	10	90
26	0	33	5	2	15	40	1.66667	1	2	3	1	1	2	4.4	5	4	4	5	3	4	1	1	3333333	5	2	12	100
26	0	33	6	2	18	40	1.66667	2	2	2	1	1	2	4.8	6	5	5	4	2	3	1	1	1666667	4	4	12	100
26	0	33	7	2	19	40	1.83333	2	2	2	2	1	2	5	5	5	5	5	2	3	1	1	1666667	6	3	12	91.7
26	0	33	8	2	21	40	1.66667	2	1	2	2	1	2	4.6	5	3	6	4	3	6	0	0	2	5	2	11	90.9
26	0	33	9	3	7	40	1.83333	2	2	2	2	1	2	4.4	5	3	5	4	3	3	0	0	2333333	5	2	12	91.7
26	0	33	10	3	10	40	1.83333	2	2	3	2	1	1	4.6	5	5	4	5	3	2	1	1	2666667	4	5	12	100
26	0	33	11	3	12	40	1.83333	2	1	2	2	2	2	4.6	5	5	5	4	4	3	1	1	3333333	5	2	12	91.7
26	0	33	12	3	14	40	1.66667	2	2	2	2	1	1	4.6	5	4	5	5	4	3	1	1	3333333	5	5	10	90
26	0	33	13	3	16	40	2	2	3	2	1	3	1	4	5	4	4	4	4	4	1	1	3	4	5	10	100
26	0	33	14	3	20	40	1.66667	2	2	3	1	1	1	4.8	5	5	5	4	4	4	0	0	3333333	5	1	13	100
26	0	33	15	3	21	40	1.5	2	1	2	1	1	2	4.4	5	3	5	3	3	5	0	0	2333333	3	2	13	100
26	0	33	16	4	8	40	1.5	1	2	2	1	1	2	4.4	4	4	5	4	3	3	0	0	3	3	2	13	92.3
26	0	33	17	4	9	40	2	2	3	3	1	1	2	4.4	5	4	4	4	4	3	1	1	3	5	3	12	100
26	0	33	18	4	12	40	1.5	2	2	2	1	1	1	4.2	4	5	4	4	4	3	1	1	3	5	2	13	100
26	0	33	19	4	14	40	2.16667	2	5	2	1	1	2	4.6	5	5	5	4	3	3	1	1	2666667	5	3	12	100
26	0	33	20	4	19	40	1.83333	2	2	2	2	1	2	5.2	6	5	5	5	4	3	0	0	2	5	2	14	92.9
26	0	33	21	4	21	40	1.83333	2	2	2	2	1	2	5.2	6	4	6	4	3	4	0	0	2	6	2	13	100
26	0	33	22	5	7	40	1.83333	2	2	2	2	1	2	4	4	4	3	4	3	4	0	0	2333333	5	2	12	91.7
26	0	33	23	5	10	40	1.33333	1	2	2	1	1	1	4.6	5	5	5	4	3	3	1	1	2666667	5	2	13	92.3
26	0	33	24	5	11	40	2.33333	2	2	6	1	1	2	4.6	5	5	4	5	4	3	1	1	3333333	5	3	13	100
26	0	33	25	5	13	40	1.66667	2	2	2	1	1	2	5	5	6	5	5	3	3	1	1	2333333	5	3	13	100
26	0	33	26	5	18	40	1.5	1	2	2	1	1	2	5.2	6	6	5	4	3	4	0	0	1666667	5	2	14	100
26	0	33	27	5	19	40	1.16667	1	1	1	1	1	2	5	5	4	6	4	2	3	0	0	2	6	4	13	100
26	0	33	28	5	22	40	1.33333	1	1	2	1	1	2	5.4	6	4	6	5	3	4	0	0	1666667	5	3	12	91.7
26	0	33	29	6	10	40	1.33333	2	2	1	1	1	1	4.6	6	5	1	5	3	2	0	0	2	5	3	13	92.3
26	0	33	30	6	11	40	1.16667	1	1	1	1	1	2	5.2	6	4	6	5	3	3	0	0	2	3	4	14	92.9
26	0	33	31	6	14	40	2.33333	2	2	4	2	2	2	5.2	6	5	6	5	3	3	0	1	3	4	4	13	100
26	0	33	32	6	16	40	1.83333	1	2	3	2	1	2	5.6	6	6	6	5	3	2	0	0	3666667	3	3	13	100
26	0	33	33	6	18	40	1.66667	1	2	3	1	1	2	5.6	6	5	6	5	4	2	1	0	2	4	6	11	100
26	0	33	34	6	20	40	1.5	1	2	2	1	1	2	5.6	6	5	6	5	2	2	1	0	2	5	5	13	84.6
26	0	33	35	7	11	40	1.16667	1	2	1	1	1	1	5	5	5	6	4	3	4	0	0	2	4	2	13	92.3
26	0	33	36	7	12	40	1.66667	2	2	2	1	1	2	4.6	2	5	6	4	2	3	0	0	2333333	4	3	13	92.3
26	0	33	37	7	14	40	1.5	2	1	2	2	1	1	5.4	6	5	6	4	3	3	0	0	1666667	3	3	13	92.3
26	0	33	38	7	15	40	1.66667	1	2	2	2	1	2	5.4	6	6	5	5	3	3	0	0	3666667	3	3	13	92.3
26	0	33	39	7	17	40	1.33333	1	1	1	2	1	2	5.6	6	5	6	5	3	3	0	0	2	6	1	12	100
26	0	33	40	7	20	40	2.5	4	4	2	2	1	2	4.8	5	5	5	4	4	3	0	0	2	4	4	12	100
27	0	34	1	2	8	36	1.16667	1	2	1	1	1	1	5.6	6	6	5	6	1	1	0	0	4333333	7	1	9	100
27	0	34	2	2	11	36	1.33333	2	2	1	1	1	1	6	6	6	6	6	1	1	1	1	3333333	6	1	10	100
27	0	34	3	2	14	36	1.5	2	2	2	1	1	1	6	6	6	6	6	1	2	1	1	2666667	6	4	10	100
27	0	34	4	2	16	36	1.5	2	2	2	1	1	1	6.2	6	6	7	6	2	2	1	1	3	6	6	8	100
27	0	34	5	2	18	36	1.5	2	2	2	1	1	1	6	6	6	6	6	1	2	1	0	1666667	7	4	11	100
27	0	34	6	3	9	36	1.5	3	1	1	2	1	1	3.4	4	4	3	3	1	6	0	0	3	5	1	11	90.9
27	0	34	7	3	10	36	1.5	2	2	2	1	1	1	4.8	5	5	5	5	1	3	0	0	4666667	6	1	12	100
27	0	34	8	3	12	36	1.66667	5	1	1	1	1	1	4	4	4	4	4	1	3	0	0	4333333	5	1	12	100
27	0	34	9	3	14	36	1	1	1	1	1	1	1	5.4	6	6	5	5	1	5	0	0	1666667	6	2	12	100
27	0	34	10	3	16	36	1	1	1	1	1	1	1	5	5	5	5	5	1	4	0	0	4	5	1	12	91.7
27	0	34	11	3	17	36	2	2	2	2	2	2	2	6	6	6	6	6	2	5	0	0	2	6	1	11	90.9
27	0	34	12	3	20	36	1	1	1	1	1	1	1	5.8	6	6	6	5	1	5	1	0	1666667	6	1	12	100
27	0	34	13	4	8	36	1	1	1	1	1	1	1	6	6	6	6	6	1	2	1	1	2666667	6	1	11	100
27	0	34	14	4	9	36	1	1	1	1	1	1	1	6	6	6	6	6	1	2	1	1	2	6	2	12	100
27	0	34	15	4	12	36	1	1	1	1	1	1	1	6	6	6	6	6	1	1	1	1	2666667	6	1	10	100
27	0	34	16	4	14	36	1.83333	1	1	1	1	1	6	6	6	6	6	6	1	2	1	1	4333333	6	2	12	100
27	0	34	17	4	20	36	1	1	1	1	1	1	1	6	6	6	6	6	1	2	1	1	4333333	6	2	11	100
27	0	34	18	4	21	36	1.83333	1	6	1	1	1	1	5.2	6	6	7	6	1	2	1	1	4	7	3	12	100
27	0	34	19	5	8	36	1	1	1	1	1	1	1	5.8	6	6	6	6	1	1	1	1	4	6	1	12	100
27	0	34	20	5	10	36	1	1	1	1	1	1	1	6	6	6	6	6	1	1	1	1	4333333	6	1	12	100
27	0	34	21	5	13	36	1	1	1	1	1	1	1	5.8	6	6	5	6	1	1	1	1	3666667	6	1	12	100
27	0	34	22	5	14	36	1	1	1	1	1	1	1	5.8	6	6	6	6	1	1	0	1	3666667	6	1	11	100
27	0	34	23	5	16	36	1	1	1	1	1	1	1	6	6	6	6	6	1	1	0	1	2666667	6	1	12	100
27	0	34	24	5	17	36	1	1	1	1	1	1	1	6	6	6	6	6	1	1	0	1	1666667	6	3	11	100
27	0	34	25	5	19	36	1	1	1	1	1	1	1	6	6	6	6	6	1	1	1	0	1333333	7	1	11	100
27	0	34	26	6	9	36	1	1	1	1	1	1	1	6	6	6	6	6	1	1	1	1	1333333	6	1	11	100
27	0	34	27	6	12	36	1	1	1	1	1	1	1	6	6	6	6	6	1	1	1	1	1666667	6	1	11	100
27	0	34	28	6	13	36	1	1	1	1	1	1	1	6	6	6	6	6	1	1	1	1	3	6	1	9	100
27	0	34	29	6	15	36	1	1	1	1	1	1	1	6	6	6	6	6	1	1	1	1	1333333	6	1	10	100
27	0	34	30	6	17	36	1.83333	1	1	1	1	1	6	6.2	6	6	6	7	1	1	1	1	1	6	3	9	100
27	0	34	31	7	10	36	1	1	1	1	1	1	1	6.2	6	7	6	6	1	1	1	1	1333333	7	1	13	100
27	0	34	32	7	14	36	1	1	1	1	1	1	1	5	5	5	5	5	1	1	1	0	4333333	6	1	11	100
27	0	34	33	7	16	36	1	1	1	1	1	1	1	6	6	6	6	6	1	1	1	0	1333333	6	1	12	100
27	0	34	34	7	17	36	1	1	1	1	1	1	1	6	6	6	6	6	1	1	1	0	4	6	1	11	100
27	0	34	35	7	19	36	1	1	1	1	1	1	1	6	6	6	6	6	1	1	1	0	1333333	6	1	12	100
27	0	34	36	7	21	36	1	1	1	1	1	1	1	6	6	6	6	6	1	3	1	0	1333333	6	1	12	100
28	0	18	1	1	9	34	2.16667	2	2	5	1	1	2	4.4	4	5	5	4	5	5	1	1	4333333	6	4	10	100
28	0	18	2	1	11	34	2	2	1	3	2	2	2	4	3	4	5	3	5	5	1	1	6333333	1	3	10	100
28	0	18	3	1	16	34	1.66667	2	1	3	1	2	1	4	4	5	4	3	5	3	1	1	3666667	3	2	10	100
28	0	18	4	1	20	34	2	4	1	2	3	1	1	3.4	3	2	5	2	5	6	1	1	3	3	5	11	100
28	0	18	5	1	21	34	1.33333	2	1	1	2	1	1	5.8	6	6	6	5	5	3	1	1	1333333	5		11	100
28	0	18	6	1	21	34	1.16667	1	1	1	1	1	2	5.6	5	5	6	6	2	5	1	1	1333333	3	4	10	100
28	0	18	7	2	12	34	3.33333	4	1	4	5	1	5	3	1	2	5	2	6	7	1	1	6333333	2	2	11	100
28	0	18	8	2	14	34	2	4	1	3	1	1	2	3.4	3	2	5	2	3	7	1	1	5	2	6	9	100
28	0	18	9	2	16	34	3.16667	3	2	5	6	1	2	3	3	4	4	2	5	6	1	1	3666667	2	4	12	100
28	0	18	10	2	18	34	1.83333	3	2	3	1	1	1	3.8	5	3	5	4	3	7	1	1	3	5	6	12	83.3
28	0	18	11	2	20	34	1.33333	3	1	1	1	1	1	3	2	3	3	2	3	7	1	1	3333333	2	2	13	100
28	0	18	12	3	9	34	3.16667	4	4	3	6	1	1	3.6	3	3	5	2	5	5	1	1	5333333	1	6	12	100
28	0	18	13	3	15	34	1.33333	2	1	1	1	1	2	4.8	5	4	6	3	2	5	1	0	2	5	5	12	100
28	0	18	14	3	17	34	1.33333	2	1	1	1	1	2	5.6	6	5	5	6	6	5	1	1	3333333	2	5	12	100
28	0	18	15	3	20	34	1.83333	3	1	1	4	1	1	4.4	3	4	6	3	3	4	1	0	3333333	4	2	13	92.3
28	0	18	16	3	21	34	1.66667	2	1	1	3	2	1	4.2	4	3	5	3	5	5	1	0	1666667	4	2	13	100
28	0	18	17	4	11	34	2	2	1	1	5	1	2	5	4	5	7	3	4	3	0	0	2666667	5	1	13	100
28	0	18	18	4	12	34	1.83333	3	1	2	3	1	1	5.2	5	4	6	5	5	4	0	0	3333333	4	1	13	100
28	0	18	19	4	13	34	2.16667	2	1	3	5	1	1	3.6	3	3	4	2	6	5	0	0	6333333	4	1	12	91.7
28	0	18	20	4	16	34	1.5	1	2	3	1	1	1	5.6	6	5	5	6	5	3	1	1	3666667	5	3	12	100
28	0	18	21	4	17	34	2.5	2	1	4	6	1	1	5.6	6	5	5	6	2	5	1	0	4	5	4	12	100
28	0	18	22	4	19	34	3.16667	2	4	5	3	3	2	3.4	5	3	2	4	6	3	1	0	6	4	2	13	100
28	0	18	23	4	20	34	4.33333	5	5	6	3	4	3	2.6	3	4	2	2	6	5	1	0	6	4	5	10	90
28	0	18	24	5	10	34	2.16667	3	1	5	2	1	1	3.6	3	2	5	3	5	6	1	0	2	5	5	11	100
28	0	18	25	5	11	34	3.16667	4	2	6	2	4	1	4.8	5	3	5	5	6	5	1	0	6333333	4	2	12	100
28	0	18	26	5	16	34	2.33333	2	1	5	4	1	1	5.8	6	5	6	5	3	6	1	1	3666667	2	5	11	100
28	0	18	27	5	17	34	2.33333	3	1	6	2	1	1	5	5	4	6	4	3	6	1	1	3	2	5	12	91.7
28	0	18	28	6	8	34	1.16667	1	1	1	2	1	1	4.6	4	3	6	5	3	5	1	1	2333333	3	4	13	92.3
28	0	18	29	6	9	34	1.33333	1	1	2	2	1	1	5.2	6	5	6	4	5	5	1	1	4	3	3	12	100
28	0	18	30	6	12	34	1.5	1	2	1	1	3	1	4	5	4	5	3	6	5	1	1	3333333	2	3	13	100
28	0	18	31	6	14	34	1.16667	2	1	1	1	1	1	5.6	6	5	5	6	3	6	1	1	4	3	2	14	100
28	0	18	32	6	16	34	1.5	1	2	3	1	1	1	4	4	4	4	3	5	5	1	1	5666667	5	5	13	84.6
28	0	18	33	6	20	34	1.5	1	1	1	4	1	1	4.4	3	4	6	3	3	5	0	0	1333333	3	2	13	100
28	0	18	34	6	21	34	1.66667	1	1	1	5	1	1	4.2	4	3	5	3	3	6	0	0	2	3	6	11	90.9
29	0	29	1	1	11	30	2.33333	3	1	3	1	3	3	3	5	3	3	3	5	5	1	1	3666667	3	2	11	100
29	0	29	2	1	12	30	2.33333	3	1	3	1	1	5	3.2	5	3	3	3	5	6	1	1	5	2	2	10	100
29	0	29	3	1	13	30	1.16667	1	2	1	1	1	1	5.2	6	5	5	5	5	5	1	1	1333333	6	3	11	100
29	0	29	4	1	15	30	1.33333	1	3	1	1	1	1	5	5	3	6	5	3	6	1	1	4	5	4	10	90
29	0	29	5	1	18	30	1.5	1	2	1	3	1	1	6	6	6	6	6	2	5	0	0	2666667	6	1	12	100
29	0	29	6	1	19	30	1.33333	1	1	1	3	1	1	6.2	6	5	7	6	2	5	0	0	3666667	5	1	12	100
29	0	29	7	1	21	30	1.16667	1	1	1	2	1	1	5.4	6	4	6	4	2	6	0	0	1	6	2	11	100
29	0	29	8	2	10	30	1	1	1	1	1	1	1	6.8	7	7	7	7	1	3	1	1	1333333	6	5	12	100
29	0	29	9	2	12	30	1.5	2	1	1	2	1	2	5.8	6	6	6	5	3	4	1	1	2	6	3	10	100
29	0	29	10	2	13	30	1.16667	1	2	1	1	1	1	5	6	5	7	1	3	4	1	1	3	6	5	10	100
29	0	29	11	2	19	30	1.16667	1	1	1	1	1	2	6.4	7	6	6	6	1	4	1	0	1	6
29	0	29	12	3	8	30	2.5	1	3	5	2	2	2	5.4	6	6	5	5	3	3	1	1	3333333	5	5	11	81.8
29	0	29	13	3	11	30	1	1	1	1	1	1	1	6	6	6	6	6	3	5	1	1	4	5	2	11	100
29	0	29	14	3	11	30	1.33333	2	2	1	1	1	1	6.4	7	7	6	6	1	3	1	1	1666667	5	2	9	100
29	0	29	15	3	15	30	1.66667	1	1	2	2	2	2	6.4	7	6	6	6	2	2	1	1	2333333	6	5	12	100
29	0	29	16	3	17	30	1.83333	1	1	2	4	2	1	6.2	7	7	5	6	3	2	0	0	3666667	6	2	12	100
29	0	29	17	3	22	30	1.5	1	1	2	2	1	2	6.2	7	5	6	7	3	2	1	1	1666667	6	3	12	100
29	0	29	18	4	15	30	2.16667	2	2	3	2	1	3	6.2	6	6	7	6	3	4	1	0	2333333	5	3	12	100
29	0	29	19	4	18	30	2.5	3	3	3	3	1	2	5.2	6	5	3	6	3	3	0	0	3333333	5	2	12	100
29	0	29	20	4	19	30	1.83333	1	2	2	2	2	2	5.4	7	4	5	6	3	3	0	0	3	5	2	12	100
29	0	29	21	4	22	30	2	2	1	2	2	3	2	5.8	6	6	6	5	3	2	0	0	3666667	5	2	12	100
29	0	29	22	5	16	30	1.16667	1	2	1	1	1	1	6.6	7	6	7	6	1	2	1	1	2	6	5	12	100
29	0	29	23	5	18	30	1.33333	1	1	1	2	2	1	6.6	7	6	7	6	2	2	1	0	1666667	6	6	11	100
29	0	29	24	5	20	30	1	1	1	1	1	1	1	6.6	7	6	6	7	3	2	1	0	1333333	5		10	90
29	0	29	25	5	21	30	1.16667	1	1	2	1	1	1	6	6	6	6	6	4	2	1	0	1333333	5		11	100
29	0	29	26	5	21	30	1.16667	1	2	1	1	1	1	6.2	7	6	6	6	3	1	1	0	1333333	5	5	11	100
29	0	29	27	6	9	30	1.83333	1	1	3	2	2	2	5.8	6	6	5	6	3	3	1	1	3666667	6	5	11	100
29	0	29	28	6	10	30	1.83333	2	2	2	2	2	1	5.6	6	6	6	5	4	3	1	1	4	5	5	11	90.9
29	0	29	29	6	20	30	2.5	3	3	3	2	2	2	5.6	6	6	5	5	5	3	1	1	3333333	5	6	11	81.8
29	0	29	30	6	21	30	2.66667	3	4	2	2	3	2	4.4	5	3	5	5	2	5	0	0	4333333	4	3	11	100
30	0	23	1	1	10	30	1.33333	2	1	1	2	1	1	4.2	4	3	5	4	5	6	0	0	3666667	5	1	10	100
30	0	23	2	1	12	30	1.33333	2	1	1	2	1	1	5	4	5	6	5	3	4	0	0	4	6	1	12	100
30	0	23	3	1	14	30	1.16667	2	1	1	1	1	1	5.4	5	5	6	5	2	4	0	0	3666667	6	2	12	100
30	0	23	4	1	15	30	1.33333	1	1	2	2	1	1	5	5	5	6	4	2	2	0	0	3666667	6	1	12	91.7
30	0	23	5	1	20	30	1.66667	1	1	2	4	1	1	4.2	5	4	5	3	2	3	0	0	1666667	5	1	12	91.7
30	0	23	6	1	21	30	1.16667	1	1	2	1	1	1	4.4	2	3	6	5	1	6	1	0	1666667	6		12	100
30	0	23	7	1	21	30	1.83333	2	1	1	5	1	1	4.2	3	3	7	3	1	5	0	0	1333333	5	5	12	100
30	0	23	8	2	9	30	1.16667	1	1	1	2	1	1	4.8	3	4	6	5	2	4	0	0	3	6	2	12	100
30	0	23	9	2	15	30	1	1	1	1	1	1	1	5.8	6	6	6	6	3	2	0	1	1333333	6	2	12	91.7
30	0	23	10	2	17	30	1.16667	1	1	2	1	1	1	5.2	6	5	6	4	4	2	0	1	3333333	5	2	13	100
30	0	23	11	2	19	30	2.16667	2	2	4	3	1	1	4	3	5	5	3	6	5	0	0	5	3	1	12	91.7
30	0	23	12	2	21	30	2.16667	3	1	4	3	1	1	4	2	2	6	5	3	6	0	0	4333333	4	1	12	100
30	0	23	13	3	10	30	1.5	2	1	2	2	1	1	6	6	6	6	6	1	3	1	1	2	5	3	12	100
30	0	23	14	3	13	30	1	1	1	1	1	1	1	6	6	6	6	6	2	2	1	1	2	6	5	11	100
30	0	23	15	3	18	30	1.16667	2	1	1	1	1	1	5.6	6	4	6	6	1	6	1	1	2	5	3	12	100
30	0	23	16	3	21	30	1.33333	1	2	2	1	1	1	5.6	6	5	6	6	2	5	1	1	1666667	5	4	12	91.7
30	0	23	17	4	10	30	1.16667	1	1	2	1	1	1	4.6	3	4	6	5	2	5	1	1	1666667	5	3	12	91.7
30	0	23	18	4	12	30	1	1	1	1	1	1	1	5.8	6	5	6	6	1	2	1	1	1333333	6	4	13	100
30	0	23	19	4	13	30	1	1	1	1	1	1	1	5	3	3	7	6	3	6	1	1	2333333	2	3	12	100
30	0	23	20	4	15	30	1.16667	1	1	2	1	1	1	3.6	2	2	6	3	2	6	1	1	1666667	5	5	12	100
30	0	23	21	4	18	30	1.5	2	1	3	1	1	1	4.6	3	3	6	5	2	5	1	1	2666667	5	2	12	100
30	0	23	22	5	8	30	1.5	3	1	2	1	1	1	3	2	2	4	2	4	6	0	0	2666667	6	2	12	91.7
30	0	23	23	5	9	30	1.66667	2	1	4	1	1	1	3.8	2	3	5	4	4	6	1	1	3333333	3	2	12	100
30	0	23	24	5	12	30	1.5	3	1	2	1	1	1	4	3	3	5	4	5	6	0	0	2333333	5	1	11	100
30	0	23	25	5	16	30	1.16667	1	1	2	1	1	1	5.4	6	5	6	5	2	4	1	0	2	5	2	12	100
30	0	23	26	5	20	30	1.16667	1	2	1	1	1	1	5	5	5	6	5	5	2	0	0	3333333	6	1	13	92.3
30	0	23	27	6	12	30	1.33333	1	2	2	1	1	1	5	5	5	6	5	5	5	1	1	3	4	1	12	100
30	0	23	28	6	13	30	1.33333	1	1	2	2	1	1	5.2	5	5	6	5	5	5	1	1	3666667	5	3	11	100
30	0	23	29	6	15	30	1.33333	2	1	2	1	1	1	3.8	3	2	5	4	3	6	1	1	4	5	3	11	90.9
30	0	23	30	6	17	30	1.5	2	2	2	1	1	1	5	5	5	5	4	2	3	0	0	1666667	6	1	13	92.3
31	0	18	1	1	18	28	2.16667	4	1	1	5	1	1	2.6	1	1	4	2	5	7	1	1	3333333	1	2	10	100
31	0	18	2	1	19	28	1.33333	3	1	1	1	1	1	2.4	1	1	2	3	2	7	1	0	2333333	1
31	0	18	3	1	19	28	1.66667	4	1	2	1	1	1	2.2	2	2	2	2	1	7	1	0	1666667	2	1	10	100
31	0	18	4	2	11	28	1	1	1	1	1	1	1	4	3	3	5	3	1	4	0	0	1333333	5	1	10	100
31	0	18	5	2	13	28	1	1	1	1	1	1	1	4.8	5	5	5	4	1	2	0	0	1333333	5	1	12	100
31	0	18	6	2	13	28	1	1	1	1	1	1	1	5.6	6	5	6	5	1	1	0	0	3	5	1	11	90.9
31	0	18	7	2	16	28	1.66667	1	5	1	1	1	1	3.4	5	5	1	1	1	5	1	1	4666667	3	5	11	100
31	0	18	8	2	18	28	2.16667	3	1	6	1	1	1	2.4	3	5	1	1	1	2	1	1	5333333	3	6	11	100
31	0	18	9	2	21	28	1.16667	2	1	1	1	1	1	3.8	4	4	4	2	1	1	1	0	1666667	3	2	11	100
31	0	18	10	3	11	28	1	1	1	1	1	1	1	3.2	2	2	5	2	2	7	1	0	2	3	7	10	100
31	0	18	11	3	21	28	1.16667	1	1	2	1	1	1	4.2	4	3	5	3	1	5	1	0	1333333	5	1	12	100
31	0	18	12	4	12	28	2	3	2	3	2	1	1	4.6	3	4	6	5	3	3	1	0	4333333	5	5	9	100
31	0	18	13	4	13	28	1.66667	2	1	2	1	2	2	4.8	4	4	6	4	3	4	1	0	4333333	3	3	11	100
31	0	18	14	4	16	28	2	2	5	2	1	1	1	4.6	5	5	5	4	3	2	1	0	2	4	5	3	66.7
31	0	18	15	4	17	28	1.33333	1	2	2	1	1	1	4	5	5	4	2	1	2	1	0	3666667	5	4	11	81.8
31	0	18	16	4	20	28	1	1	1	1	1	1	1	4.6	4	4	5	4	1	1	1	0	1333333	5	1	9	100
31	0	18	17	4	21	28	1	1	1	1	1	1	1	2.8	4	3	5	1	1	6	1	0	1333333	6	2	11	100
31	0	18	18	5	7	28	1.5	1	1	4	1	1	1	2.4	2	1	3	1	3	7	1	1	5333333	3	3	10	100
31	0	18	19	5	10	28	2	5	1	3	1	1	1	3	3	4	3	2	3	6	1	1	5333333	2	4	11	100
31	0	18	20	5	12	28	2.5	5	1	2	5	1	1	2.8	3	3	3	1	3	7	1	1	5666667	2	2	11	90.9
31	0	18	21	5	13	28	1	1	1	1	1	1	1	5	5	5	5	5	1	1	1	1	3333333	4	6	7	71.4
31	0	18	22	5	15	28	1.66667	3	1	3	1	1	1	2.4	3	2	2	1	4	7	1	1	5	2	5	11	72.7
31	0	18	23	6	8	28	1.66667	2	1	4	1	1	1	2.4	2	2	2	1	1	7	1	1	5666667	2	5	10	100
31	0	18	24	6	9	28	2.83333	6	1	6	2	1	1	1.6	2	2	2	1	5	7	1	1	5666667	1	1	11	90.9
31	0	18	25	6	12	28	1.16667	2	1	1	1	1	1	3.8	3	3	5	2	1	6	1	0	1333333	2	1	12	100
31	0	18	26	6	13	28	1	1	1	1	1	1	1	3.8	2	5	4	3	1	6	1	0	1333333	1	2	11	100
31	0	18	27	6	16	28	1.16667	1	1	2	1	1	1	4	5	3	4	4	2	4	1	0	1666667	6	1	10	100
31	0	18	28	6	20	28	1	1	1	1	1	1	1	5.2	5	5	5	5	1	3	1	0	1333333	6	2	11	100
32	0	23	1	2	10	31	2.33333	3	3	2	2	2	2	4.6	5	5	5	5	2	5	0	1	2	5	2	13	100
32	0	23	2	2	13	31	1.66667	2	3	1	2	1	1	4.8	6	5	5	4	1	4	0	1	3666667	5	2	12	100
32	0	23	3	2	18	31	2	2	2	2	2	2	2	5.8	6	6	6	6	2	2	1	0	2	5	5	12	100
32	0	23	4	2	19	31	1.33333	1	2	1	1	1	2	5.2	6	5	5	5	2	2	0	0	2	5	3	13	100
32	0	23	5	2	21	31	1.83333	2	2	2	2	2	1	5.4	6	6	5	5	2	5	1	0	3	5	3	13	100
32	0	23	6	3	11	31	1.5	1	2	1	2	2	1	4.6	5	5	5	5	2	2	1	0	2333333	5	5	13	100
32	0	23	7	3	18	31	1.33333	1	2	1	1	2	1	5.4	6	5	6	5	2	1	1	1	2	5	3	13	92.3
32	0	23	8	3	21	31	1	1	1	1	1	1	1	5	6	3	5	6	2	5	1	0	1666667	3	5	11	100
32	0	23	9	4	10	31	1.33333	2	2	1	1	1	1	4.6	5	4	5	4	4	4	0	0	2666667	4	2	11	100
32	0	23	10	4	12	31	2	2	2	2	3	2	1	4.2	5	3	5	4	3	2	0	0	3333333	5	3	12	91.7
32	0	23	11	4	13	31	2	2	2	2	2	2	2	4.6	5	4	5	4	2	2	0	0	2666667	4	2	14	100
32	0	23	12	4	15	31	1.83333	2	2	2	2	2	1	5	5	5	5	5	3	2	0	0	2	5	3	12	100
32	0	23	13	4	17	31	2	2	2	2	2	2	2	5.2	6	5	5	5	2	2	0	0	3	5	2	13	84.6
32	0	23	14	4	19	31	2	2	2	2	2	2	2	5.2	6	5	5	5	3	2	1	0	3666667	5	2	14	85.7
32	0	23	15	4	21	31	1.66667	1	2	2	1	2	2	5.6	5	5	5	6	3	4	1	0	2	5	2	14	92.9
32	0	23	16	5	9	31	1.5	1	1	2	2	2	1	3.8	3	3	5	3	3	5	0	0	3333333	5	2	13	84.6
32	0	23	17	5	15	31	1.33333	2	1	2	1	1	1	5.4	6	5	5	5	3	5	1	0	2666667	5	3	12	91.7
32	0	23	18	5	17	31	1.83333	2	2	2	1	2	2	4	5	4	4	4	3	4	1	0	4333333	5	3	13	92.3
32	0	23	19	5	19	31	1.83333	2	2	2	1	2	2	5.2	5	5	6	5	5	4	1	0	2	5	3	14	100
32	0	23	20	5	20	31	2.83333	3	3	3	3	3	2	4.8	5	4	5	5	3	4	1	0	3	4	3	13	92.3
32	0	23	21	6	8	31	1.66667	1	2	2	1	2	2	3.2	4	2	4	3	3	5	0	0	3333333	3	2	11	100
32	0	23	22	6	10	31	1.83333	2	2	1	2	2	2	5	6	5	5	5	3	4	1	0	3	5	3	12	100
32	0	23	23	6	13	31	2	2	2	2	2	2	2	4.8	5	5	5	5	4	3	1	1	2666667	5	5	13	100
32	0	23	24	6	16	31	2.16667	2	3	2	2	2	2	4.8	5	5	5	5	3	3	1	1	3	5	5	13	100
32	0	23	25	6	18	31	2.16667	2	3	2	2	2	2	5.4	5	5	6	6	2	2	1	1	4333333	5	5	12	75
32	0	23	26	6	21	31	1.66667	2	2	1	2	2	1	5	6	4	5	5	3	2	1	0	4	5	3	13	100
32	0	23	27	7	9	31	2.66667	2	4	2	2	3	3	4.8	5	5	5	4	4	4	0	1	3666667	5	2	15	100
32	0	23	28	7	13	31	2.16667	2	4	2	1	3	1	5.2	6	5	4	6	2	2	0	1	3666667	6	3	13	92.3
32	0	23	29	7	17	31	1.16667	1	2	1	1	1	1	5	5	5	5	5	2	2	1	0	3	5	2	13	100
32	0	23	30	7	19	31	1.33333	2	2	1	1	1	1	5.2	5	5	5	6	3	3	0	0	4333333	5	5	13	100
32	0	23	31	7	22	31	1.16667	1	2	1	1	1	1	5.2	5	6	5	5	2	4	1	0	2	5	6	12	91.7
33	1	21	1	1	9	28	1.16667	2	1	1	1	1	1	3.6	3	5	4	2	1	3	0	0	1666667	4	1	11	100
33	1	21	2	1	14	28	1.33333	1	2	2	1	1	1	2.2	2	2	3	1	1	5	0	0	3333333	6	1	11	100
33	1	21	3	1	16	28	1.5	1	2	3	1	1	1	2.8	2	3	4	1	1	3	1	1	4	3	4	10	100
33	1	21	4	1	21	28	1.16667	1	1	2	1	1	1	2	1	1	4	1	2	5	1	0	1	7	3	12	100
33	1	21	5	2	10	28	2.16667	2	1	6	2	1	1	1.8	2	3	2	1	1	6	1	0	2333333	6	1	12	100
33	1	21	6	2	13	28	1.16667	1	1	2	1	1	1	3.2	4	3	4	1	2	5	0	0	2333333	6	3	12	100
33	1	21	7	2	15	28	1	1	1	1	1	1	1	3	5	3	3	2	2	6	0	0	3333333	4	2	13	100
33	1	21	8	3	10	28	1	1	1	1	1	1	1	4.4	4	5	5	4	2	5	1	0	3333333	7	3	11	100
33	1	21	9	3	12	28	1	1	1	1	1	1	1	4.4	5	5	5	3	2	2	1	0	3333333	5	2	12	100
33	1	21	10	3	15	28	1	1	1	1	1	1	1	3	4	4	5	1	2	1	1	0	4666667	6	3	12	100
33	1	21	11	3	20	28	1.16667	1	1	2	1	1	1	3.8	5	4	3	3	2	3	1	0	2	6	2	13	100
33	1	21	12	3	21	28	1	1	1	1	1	1	1	3.6	3	4	5	3	1	3	1	0	1666667	6
33	1	21	13	3	21	28	1	1	1	1	1	1	1	4	5	4	5	3	1	3	1	0	1666667	5	3	12	100
33	1	21	14	4	9	28	1.16667	1	1	1	1	2	1	1.8	2	2	2	2	1	6	1	0	1666667	1	3	9	100
33	1	21	15	4	18	28	1.66667	1	1	5	1	1	1	3	5	5	2	1	1	5	0	0	2	5	3	13	100
33	1	21	16	4	20	28	1.66667	1	1	5	1	1	1	1.8	2	2	1	1	1	4	1	0	2333333	3		13	100
33	1	21	17	4	20	28	1.83333	1	1	6	1	1	1	2.2	2	4	2	1	3	5	1	0	1666667	2	2	13	100
33	1	21	18	5	8	28	1.66667	1	1	3	3	1	1	2.2	3	2	1	2	2	5	0	0	4333333	4	1	12	100
33	1	21	19	5	12	28	1.16667	1	1	2	1	1	1	2.2	3	2	2	1	2	5	0	0	2666667	3	2	12	100
33	1	21	20	5	13	28	1.16667	1	1	2	1	1	1	2.4	2	2	2	2	3	5	0	0	2666667	3	5	12	100
33	1	21	21	5	18	28	2.66667	5	1	4	2	1	3	1.6	2	2	1	1	6	4	0	0	5333333	5		12	91.7
33	1	21	22	5	20	28	1.66667	5	1	1	1	1	1	3	3	3	2	3	3	5	0	0	2666667	3		12	100
33	1	21	23	5	20	28	1.33333	1	1	3	1	1	1	2.4	2	4	2	2	1	4	1	1	5	4	3	10	100
33	1	21	24	6	9	28	1.33333	1	1	3	1	1	1	2	2	2	1	2	3	6	1	0	3666667	4	1	11	100
33	1	21	25	6	9	28	1	1	1	1	1	1	1	2.6	2	4	3	1	2	6	1	0	6	5	3	12	100
33	1	21	26	6	12	28	1.33333	1	1	3	1	1	1	2.2	2	1	3	2	1	5	1	1	5333333	5	5	13	100
33	1	21	27	6	13	28	1.5	1	1	4	1	1	1	2.4	3	3	2	2	4	5	1	1	6	3	3	14	100
33	1	21	28	6	16	28	2.5	3	2	6	2	1	1	1.4	2	1	1	1	3	5	1	1	6	3	4	13	100
34	1	19	1	1	8	34	4	4	4	5	3	5	3	3.8	3	3	5	3	4	6	1	0	5	5	2	12	91.7
34	1	19	2	1	9	34	2.83333	2	3	6	1	2	3	4	3	3	5	4	3	4	1	1	4	5	5	11	100
34	1	19	3	1	11	34	3.5	3	3	4	3	5	3	3.2	4	3	4	2	4	4	1	1	5333333	6	1	12	91.7
34	1	19	4	1	14	34	2.66667	3	3	2	2	4	2	5.2	5	5	6	5	2	4	0	1	2333333	6	1	12	100
34	1	19	5	1	15	34	3	2	5	2	3	4	2	4.8	5	5	5	3	5	4	1	1	3	4	2	13	100
34	1	19	6	1	17	34	1.66667	2	2	1	1	3	1	5.6	6	6	6	5	1	2	1	1	2333333	6	5	10	100
34	1	19	7	1	19	34	1	1	1	1	1	1	1	6.6	7	7	6	6	1	1	1	1	1	7	5	11	100
34	1	19	8	1	20	34	1	1	1	1	1	1	1	6.6	7	7	7	6	1	1	1	1	1	7
34	1	19	9	2	7	34	2.83333	2	2	3	2	3	5	3.6	2	3	5	2	3	6	0	1	4333333	4	3	10	100
34	1	19	10	2	9	34	3	1	5	2	2	5	3	3.6	5	5	2	5	3	3	1	1	5	2	4	12	100
34	1	19	11	2	11	34	3.5	3	2	4	2	5	5	3	3	2	3	2	4	7	0	1	4333333	2	5	11	100
34	1	19	12	2	14	34	1.66667	2	1	2	1	2	2	4.8	5	3	5	5	2	6	0	0	1	6	2	12	100
34	1	19	13	2	15	34	3.5	3	3	5	3	5	2	3.4	3	4	4	2	5	6	0	0	2333333	4	1	14	100
34	1	19	14	2	17	34	3.33333	2	3	4	3	3	5	4.4	4	3	3	5	5	6	0	0	2666667	6	1	12	100
34	1	19	15	2	19	34	3.83333	3	2	7	3	3	5	3.6	2	2	5	4	4	5	0	0	3	4	2	12	100
34	1	19	16	3	7	34	4	3	5	4	4	5	3	3.8	3	4	5	4	3	6	1	1	6	5	3	13	100
34	1	19	17	3	14	34	3.16667	2	3	5	2	2	5	5.8	6	6	6	5	3	3	1	1	3333333	4	5	12	100
34	1	19	18	3	17	34	2.66667	2	2	3	2	2	5	5.2	5	5	6	4	2	3	0	0	1333333	4	1	14	100
34	1	19	19	3	19	34	2.83333	2	3	3	2	3	4	5	5	5	5	5	3	4	1	1	3	3	5	12	100
34	1	19	20	3	21	34	2.5	2	2	4	2	2	3	5.2	5	6	6	4	4	5	1	1	3	4	4	14	100
34	1	19	21	4	13	34	3.33333	3	3	5	2	2	5	5.4	5	5	6	5	4	5	0	1	4	5	5	11	100
34	1	19	22	4	20	34	2.83333	3	3	2	3	3	3	4.2	4	5	4	5	5	6	0	0	2666667	5	1	13	92.3
34	1	19	23	5	11	34	3.66667	2	3	5	2	5	5	5.2	5	5	5	6	3	5	0	0	2666667	5	2	13	100
34	1	19	24	5	12	34	3.5	3	3	5	3	3	4	5.2	5	5	5	5	3	4	0	0	4666667	4	1	12	100
34	1	19	25	5	14	34	2.83333	2	3	4	3	2	3	5.4	5	5	6	6	4	5	0	0	2333333	5	2	12	100
34	1	19	26	5	15	34	3.5	4	3	5	3	3	3	5	5	4	5	5	4	3	1	1	3666667	3	3	13	100
34	1	19	27	5	17	34	3.66667	3	5	3	3	5	3	4	4	5	5	3	5	4	0	1	4666667	3	3	10	100
34	1	19	28	6	9	34	3	2	3	4	3	3	3	5.2	5	5	5	5	3	5	1	0	5333333	4	5	8	75
34	1	19	29	6	9	34	2.83333	2	3	3	1	4	4	5.2	5	5	5	5	5	5	1	1	4	5	3	10	100
34	1	19	30	6	12	34	3.16667	2	5	5	1	3	3	5.6	5	5	7	6	3	4	1	0	3333333	4	4	10	90
34	1	19	31	6	14	34	3.33333	2	3	4	3	4	4	5.2	5	5	5	6	3	3	1	0	4666667	4	5	13	100
34	1	19	32	6	15	34	3.66667	3	3	5	4	3	4	4.8	5	4	3	6	3	6	0	1	4	4	3	14	100
34	1	19	33	6	20	34	2.66667	3	2	5	2	2	2	5	4	5	5	5	2	2	0	0	3333333	4	3	13	100
34	1	19	34	6	20	34	2.83333	2	3	5	3	2	2	4.4	4	3	5	5	3	3	0	0	3333333	5	3	12	100
35	1	47	1	1	9	40	1.5	2	2	1	2	1	1	6	6	6	7	5	2	2	1	1	1333333	1	3	8	100
35	1	47	2	1	9	40	1.66667	1	2	1	2	2	2	6	5	6	6	7	2	2	1	1	4	5	2	8	100
35	1	47	3	1	18	40	1.83333	1	2	2	1	2	3	6	6	6	6	7	1	2	1	0	3333333	1	5	10	100
35	1	47	4	1	20	40	1.33333	2	1	1	1	2	1	6.4	7	6	6	7	1	1	1	0	1333333	7	2	10	100
35	1	47	5	2	9	40	1.33333	1	2	1	2	1	1	5.8	6	7	5	6	1	2	1	1	1666667	2	6	12	100
35	1	47	6	2	10	40	1.33333	2	1	1	2	1	1	6.6	7	7	7	6	1	1	1	1	1333333	7	1	11	100
35	1	47	7	2	12	40	1.16667	1	1	1	1	2	1	6.4	6	6	6	7	1	1	0	0	1333333	7	1	11	100
35	1	47	8	2	13	40	1	1	1	1	1	1	1	6.6	7	7	7	6	1	1	1	1	1	6	1	11	100
35	1	47	9	2	15	40	1.16667	1	2	1	1	1	1	6.4	6	6	6	7	1	1	1	1	1	6	2	10	100
35	1	47	10	2	17	40	1.33333	1	1	2	1	1	2	6.4	6	6	7	6	1	1	1	0	1666667	7	1	10	100
35	1	47	11	2	19	40	1.33333	1	1	2	2	1	1	5.6	5	6	5	6	1	1	1	0	1333333	6	2	11	100
35	1	47	12	2	22	40	1	1	1	1	1	1	1	7	7	7	7	7	1	1	1	0	1	7	1	11	100
35	1	47	13	3	9	40	1.16667	1	1	2	1	1	1	6.4	6	7	7	6	1	1	1	0	1333333	7	1	11	100
35	1	47	14	3	9	40	1	1	1	1	1	1	1	6.6	7	7	6	7	1	1	1	0	1333333	6	2	9	100
35	1	47	15	3	11	40	1	1	1	1	1	1	1	7	7	7	7	7	1	1	1	0	1	7	1	12	100
35	1	47	16	3	14	40	1	1	1	1	1	1	1	7	7	7	7	7	1	1	1	0	1	6	1	11	100
35	1	47	17	3	15	40	1.16667	1	1	1	1	2	1	6.2	6	6	7	6	1	1	1	0	1	6	1	12	100
35	1	47	18	3	17	40	1	1	1	1	1	1	1	7	7	7	7	7	1	1	1	0	1	7	1	9	100
35	1	47	19	3	19	40	1	1	1	1	1	1	1	6.4	7	6	6	6	1	1	1	0	1333333	1	1	10	90
35	1	47	20	3	22	40	1	1	1	1	1	1	1	6.6	7	7	7	6	1	1	1	0	1	7	1	11	100
35	1	47	21	4	10	40	1	1	1	1	1	1	1	7	7	7	7	7	1	1	0	0	1	7	1	12	100
35	1	47	22	4	11	40	1	1	1	1	1	1	1	7	7	7	7	7	1	1	1	1	1333333	7	1	12	100
35	1	47	23	4	14	40	1	1	1	1	1	1	1	6	6	5	7	5	1	4	1	0	1	5	2	11	100
35	1	47	24	4	15	40	1	1	1	1	1	1	1	6.4	6	7	7	6	1	1	1	0	1	7	1	12	100
35	1	47	25	4	18	40	1	1	1	1	1	1	1	6.2	6	6	6	6	1	1	1	0	1333333	6	1	12	100
35	1	47	26	4	20	40	1	1	1	1	1	1	1	5.8	6	5	6	5	1	4	1	0	1666667	6	2	11	100
35	1	47	27	5	8	40	1	1	1	1	1	1	1	5.8	6	6	6	6	1	1	1	1	1	7	1	12	100
35	1	47	28	5	9	40	1	1	1	1	1	1	1	6	6	6	6	6	1	1	1	1	1333333	7	1	11	100
35	1	47	29	5	11	40	1	1	1	1	1	1	1	6	6	6	6	6	1	1	1	1	1333333	6	1	12	100
35	1	47	30	5	14	40	1	1	1	1	1	1	1	6.4	7	7	6	6	2	1	1	1	1333333	6	1	12	100
35	1	47	31	5	15	40	1	1	1	1	1	1	1	6.4	7	7	6	6	1	1	0	1	1333333	6	1	12	100
35	1	47	32	5	17	40	1	1	1	1	1	1	1	6.4	6	6	7	7	1	1	0	0	1	6	1	11	100
35	1	47	33	5	19	40	1	1	1	1	1	1	1	6.2	6	6	6	6	1	1	0	0	1333333	6	1	11	100
35	1	47	34	5	21	40	1	1	1	1	1	1	1	5.8	6	5	6	5	1	5	0	0	1333333	6	2	11	100
35	1	47	35	6	7	40	1	1	1	1	1	1	1	6	6	6	7	6	1	2	0	1	1333333	6	1	13	100
35	1	47	36	6	11	40	1	1	1	1	1	1	1	6	6	6	6	6	1	5	0	1	1333333	6	1	11	100
35	1	47	37	6	14	40	1	1	1	1	1	1	1	6.2	6	6	7	6	1	1	0	0	1333333	7	1	13	100
35	1	47	38	6	15	40	1	1	1	1	1	1	1	6	6	6	6	6	1	1	0	0	1333333	6	1	11	100
35	1	47	39	6	18	40	1	1	1	1	1	1	1	6	6	6	6	6	1	1	1	1	1333333	6	1	10	100
35	1	47	40	6	21	40	1	1	1	1	1	1	1	5.8	6	5	6	5	1	4	0	0	1333333	5	2	11	100
36	0	20	1	1	7	41	2.5	4	3	5	1	1	1	1	1	1	1	1	5	7	0	0	3	5	1	9	100
36	0	20	2	1	10	41	2.33333	5	1	5	1	1	1	3.2	3	3	3	1	7	7	0	0	3333333	4	1	12	100
36	0	20	3	1	13	41	1.83333	1	1	6	1	1	1	2.4	1	1	3	1	3	6	1	1	3333333	6	1	11	100
36	0	20	4	1	16	41	2.16667	3	1	6	1	1	1	2	1	1	3	1	7	7	1	0	1	5	1	10	100
36	0	20	5	1	17	41	1.5	1	1	4	1	1	1	2.4	2	2	2	1	7	6	1	0	1	7	2	12	100
36	0	20	6	2	8	41	1	1	1	1	1	1	1	4	3	3	5	3	1	1	1	1	2666667	6	1	11	100
36	0	20	7	2	10	41	1	1	1	1	1	1	1	4.4	4	4	2	6	7	7	1	1	3666667	6	1	11	100
36	0	20	8	2	12	41	1	1	1	1	1	1	1	5.8	7	6	5	5	4	6	1	0	1	6	1	11	100
36	0	20	9	2	16	41	1	1	1	1	1	1	1	6.2	7	7	5	5	4	5	1	0	1333333	7	1	10	100
36	0	20	10	2	17	41	2	1	1	7	1	1	1	4.4	7	6	3	1	4	6	1	0	1	5	1	12	83.3
36	0	20	11	2	20	41	2.66667	5	1	7	1	1	1	2.2	6	1	1	1	1	7	1	1	4	7		12	100
36	0	20	12	2	20	41	2.5	5	1	6	1	1	1	2.6	1	1	5	1	3	7	1	1	4333333	4	1	12	83.3
36	0	20	13	3	9	41	1	1	1	1	1	1	1	3.2	2	2	6	1	6	6	1	0	1	3	1	10	100
36	0	20	14	3	9	41	1.83333	1	1	6	1	1	1	1.6	1	1	1	1	6	7	1	0	2	1	1	9	77.8
36	0	20	15	3	12	41	1.5	1	1	4	1	1	1	5.6	7	4	6	5	7	7	1	0	1	6	1	13	100
36	0	20	16	3	13	41	1.33333	1	1	3	1	1	1	5.6	6	7	5	4	6	5	1	0	3	7	1	12	100
36	0	20	17	3	15	41	1.5	1	1	4	1	1	1	4.8	5	5	5	3	6	7	0	0	5666667	6	1	12	100
36	0	20	18	3	17	41	1.5	2	1	3	1	1	1	4.8	4	6	5	3	6	6	1	0	6666667	2	4	12	91.7
36	0	20	19	3	19	41	1	1	1	1	1	1	1	5.8	6	4	7	6	5	7	1	0	6666667	6	1	12	100
36	0	20	20	3	21	41	1	1	1	1	1	1	1	5.8	7	7	4	5	6	7	1	0	1666667	7	1	12	100
36	0	20	21	4	9	41	1.33333	1	1	3	1	1	1	2.2	1	2	1	2	5	7	0	0	1	6	1	11	90.9
36	0	20	22	4	11	41	1.5	1	1	3	1	2	1	4.6	5	5	1	6	5	5	0	0	4333333	4	1	11	100
36	0	20	23	4	12	41	1	1	1	1	1	1	1	5.2	6	4	5	5	3	6	1	0	1	6	1	12	100
36	0	20	24	4	14	41	1.66667	1	1	1	5	1	1	5.6	6	6	5	6	3	2	1	0	1	6	1	12	100
36	0	20	25	4	15	41	1.16667	1	1	2	1	1	1	5.2	6	5	6	5	7	5	1	0	3666667	5	1	13	100
36	0	20	26	4	22	41	1	1	1	1	1	1	1	5.8	7	7	4	6	5	5	1	1	1	7	1	11	100
36	0	20	27	5	9	41	1	1	1	1	1	1	1	4.4	5	4	6	4	2	6	1	1	6	6	1	11	90.9
36	0	20	28	5	10	41	1.66667	1	5	1	1	1	1	4.6	5	4	5	3	5	5	1	1	5333333	5	1	12	100
36	0	20	29	5	12	41	1	1	1	1	1	1	1	3.6	5	1	5	2	5	5	1	1	5333333	4	1	11	100
36	0	20	30	5	14	41	2	1	1	7	1	1	1	4.6	5	5	1	6	5	6	1	0	1	4	7	12	100
36	0	20	31	5	17	41	2	1	1	7	1	1	1	2.6	5	3	1	1	5	7	1	0	6	6	1	11	90.9
36	0	20	32	5	19	41	1	1	1	1	1	1	1	5.4	7	7	4	4	1	3	1	0	3333333	6	1	11	100
36	0	20	33	5	20	41	1	1	1	1	1	1	1	5.4	5	5	6	6	4	3	1	0	1	6		12	100
36	0	20	34	5	20	41	1.66667	1	1	5	1	1	1	4.6	5	7	1	6	5	5	1	0	5	5	1	12	100
36	0	20	35	6	7	41	1.83333	1	1	6	1	1	1	3.6	4	4	4	1	2	6	1	1	6	6	1	12	100
36	0	20	36	6	13	41	1	1	1	1	1	1	1	5	6	6	4	5	6	5	1	0	6333333	5	1	13	100
36	0	20	37	6	13	41	1.33333	1	1	3	1	1	1	4.8	7	6	1	5	5	7	1	0	5333333	2	4	14	100
36	0	20	38	6	16	41	1	1	1	1	1	1	1	5.4	6	4	5	6	4	4	1	0	1	7	1	12	91.7
36	0	20	39	6	18	41	3.16667	2	6	3	1	1	6	4.8	6	6	6	5	7	5	1	1	4666667	6	6	12	100
36	0	20	40	6	20	41	2.66667	1	5	7	1	1	1	2.8	5	5	2	1	4	7	1	1	5	1	7	13	84.6
36	0	20	41	6	20	41	2.66667	1	1	6	6	1	1	1.6	1	1	1	1	7	7	1	1	5	1	7	12	100
37	0	18	1	1	8	35	2.83333	4	4	2	3	2	2	4.8	5	5	4	5	3	5	1	1	4	5	1	10	100
37	0	18	2	1	10	35	3	3	6	2	2	3	2	4.8	5	4	5	5	6	5	0	0	1333333	6	2	10	90
37	0	18	3	1	12	35	2.33333	3	3	2	2	2	2	5.4	6	6	5	5	3	5	1	1	2333333	6	5	11	100
37	0	18	4	1	14	35	2.33333	3	3	2	2	2	2	5	5	5	6	5	5	5	0	0	4	4	3	12	91.7
37	0	18	5	1	15	35	2.5	3	2	3	3	3	1	3.8	5	3	4	4	6	6	0	0	4	5	3	13	92.3
37	0	18	6	2	9	35	2	2	3	2	2	2	1	5.4	5	5	5	6	1	5	0	0	1	7	2	12	100
37	0	18	7	2	11	35	2.5	3	5	2	2	2	1	4.4	5	3	5	5	4	5	1	0	3666667	3	6	12	100
37	0	18	8	2	13	35	3.66667	3	6	4	4	4	1	3.4	4	3	4	4	6	6	0	0	4666667	2	3	10	100
37	0	18	9	2	16	35	3.33333	4	5	3	4	3	1	4.6	5	5	4	5	5	5	1	0	4666667	4	2	12	100
37	0	18	10	2	17	35	2.16667	3	5	2	1	1	1	4.4	4	4	5	4	3	7	1	0	1	4	5	12	100
37	0	18	11	2	20	35	2.33333	3	4	2	2	2	1	5.4	5	4	6	6	3	5	1	0	1	7	7	13	92.3
37	0	18	12	2	21	35	1.83333	2	2	2	2	2	1	6	6	6	6	6	2	6	1	1	1	7	7	12	100
37	0	18	13	3	13	35	3.16667	4	3	3	3	2	4	5	5	5	5	5	4	5	1	0	5	5	2	12	91.7
37	0	18	14	3	16	35	2.83333	4	4	2	3	2	2	5.4	5	5	6	6	5	5	0	0	4666667	6	6	12	91.7
37	0	18	15	3	17	35	2	2	3	2	2	2	1	5.2	5	4	5	6	3	6	1	0	1	6
37	0	18	16	3	17	35	2.33333	2	3	3	2	2	2	5.4	5	4	6	5	3	5	1	0	1	7	6	13	100
37	0	18	17	4	9	35	3.16667	3	4	3	4	4	1	4.4	5	5	4	4	5	6	1	1	4666667	3	6	12	91.7
37	0	18	18	4	9	35	3	3	4	4	4	2	1	4	4	5	4	4	5	6	1	1	4666667	5	6	12	100
37	0	18	19	4	13	35	2.83333	4	6	1	2	3	1	3.6	4	3	5	4	5	5	0	0	4666667	4	2	13	100
37	0	18	20	4	16	35	2.83333	2	4	1	5	4	1	4.4	4	4	5	4	5	6	0	0	4666667	6	3	12	91.7
37	0	18	21	4	18	35	2.16667	2	5	1	3	1	1	5.4	6	4	6	5	4	6	1	0	4333333	4	4	13	100
37	0	18	22	4	19	35	1.66667	3	2	1	2	1	1	4.6	5	4	6	4	5	6	1	0	4666667	4	3	12	100
37	0	18	23	5	9	35	2.16667	4	4	1	2	1	1	4.4	4	5	5	4	3	6	1	1	4666667	3	7	11	100
37	0	18	24	5	11	35	2.16667	3	4	1	2	2	1	5	5	5	5	5	5	6	0	0	1	5	6	12	83.3
37	0	18	25	5	12	35	2.83333	4	4	2	4	2	1	4.8	5	5	5	5	5	7	0	1	4666667	4	3	12	100
37	0	18	26	5	13	35	4.5	5	5	5	5	2	5	3.6	5	4	3	3	5	7	0	0	4666667	3	3	13	100
37	0	18	27	5	18	35	2.5	4	3	3	2	2	1	5	5	4	5	6	5	6	1	0	4666667	4	5	14	100
37	0	18	28	5	19	35	2.83333	4	3	3	4	2	1	4	4	4	5	3	5	6	1	0	4666667	4	4	13	92.3
37	0	18	29	5	21	35	2	3	3	1	2	2	1	5	5	5	5	5	5	6	1	0	1	6	7	12	100
37	0	18	30	6	9	35	2.66667	2	4	2	4	3	1	4.6	5	5	5	4	5	6	0	1	4	4	5	12	91.7
37	0	18	31	6	11	35	2.83333	3	5	2	2	2	3	4.2	5	4	4	4	6	6	1	1	4666667	4	6	13	100
37	0	18	32	6	13	35	3	4	3	4	3	3	1	4.2	5	5	4	4	6	6	1	0	4666667	4	6	12	100
37	0	18	33	6	18	35	2.66667	2	5	1	2	5	1	4.4	4	3	5	5	5	6	1	0	4666667	4	6	13	92.3
37	0	18	34	6	19	35	2.16667	2	5	1	2	2	1	4.8	5	4	5	5	6	6	1	0	4666667	3	6	10	100
37	0	18	35	6	21	35	2	2	4	1	2	2	1	4.6	4	4	4	5	6	7	1	0	1333333	7	7	12	100
38	0	19	1	1	11	31	1	1	1	1	1	1	1	5.2	5	4	6	5	1	5	1	0	1	7	6	13	100
38	0	19	2	1	13	31	1	1	1	1	1	1	1	5.4	5	6	6	7	2	3	0	1	4666667	6	5	13	100
38	0	19	3	1	15	31	1.66667	1	1	5	1	1	1	6	6	6	6	7	1	3	1	0	2333333	7	4	13	92.3
38	0	19	4	1	17	31	2.83333	3	1	6	1	1	5	3.8	3	3	3	5	3	4	1	0	1666667	6	3	12	91.7
38	0	19	5	1	19	31	1	1	1	1	1	1	1	4.8	2	3	7	5	1	3	1	1	1333333	6	2	14	85.7
38	0	19	6	1	20	31	1.5	4	1	1	1	1	1	4.6	2	6	5	3	1	5	1	1	4	5	7	13	84.6
38	0	19	7	2	11	31	1	1	1	1	1	1	1	4.2	4	4	6	5	1	1	1	1	1666667	7	1	14	100
38	0	19	8	2	16	31	1	1	1	1	1	1	1	6.4	6	7	6	7	1	4	1	1	1666667	6	5	13	100
38	0	19	9	2	17	31	1	1	1	1	1	1	1	6.6	6	7	7	7	1	4	1	1	1	7	3	14	100
38	0	19	10	2	20	31	1.5	1	1	1	1	1	4	6.8	6	7	7	7	3	4	1	1	1	7	6	12	91.7
38	0	19	11	3	11	31	2	1	1	6	1	1	2	4.8	3	6	6	4	3	4	1	0	2666667	6	4	14	100
38	0	19	12	3	12	31	1.33333	1	1	3	1	1	1	5.4	5	6	5	5	1	5	1	1	2333333	4	5	14	85.7
38	0	19	13	3	14	31	1.33333	1	1	3	1	1	1	6.4	6	7	6	7	1	4	1	1	2333333	7	3	14	100
38	0	19	14	3	20	31	2.16667	4	1	5	1	1	1	4	6	1	2	5	3	5	1	0	1333333	6	5	13	100
38	0	19	15	3	20	31	1.33333	1	1	3	1	1	1	4.4	5	4	4	6	3	4	1	0	1	5	5	14	85.7
38	0	19	16	4	10	31	3.66667	4	4	4	6	1	3	3.6	4	4	3	3	6	6	0	0	1333333	2	6	12	100
38	0	19	17	4	12	31	3.66667	7	5	5	3	1	1	2.6	3	3	2	2	5	6	0	0	1	3	6	15	80
38	0	19	18	4	13	31	1.66667	5	1	1	1	1	1	4.2	5	3	5	3	5	7	1	1	4333333	5	5	13	100
38	0	19	19	4	16	31	1	1	1	1	1	1	1	3.8	5	5	2	2	5	6	0	0	1333333	3	4	13	100
38	0	19	20	4	20	31	1	1	1	1	1	1	1	5.6	5	5	5	6	1	4	1	0	1	6	1	13	100
38	0	19	21	4	21	31	1	1	1	1	1	1	1	5.2	6	5	5	3	1	4	1	0	1	5	2	13	92.3
38	0	19	22	5	8	31	1	1	1	1	1	1	1	4.6	6	2	4	4	1	6	1	1	4	5	4	14	92.9
38	0	19	23	5	10	31	1	1	1	1	1	1	1	4.2	6	5	5	1	1	6	0	0	4666667	5	2	14	92.9
38	0	19	24	5	12	31	1	1	1	1	1	1	1	6	6	7	6	7	1	6	0	0	4	5	6	12	100
38	0	19	25	5	13	31	1	1	1	1	1	1	1	5.2	6	6	6	1	1	5	1	1	3333333	5	3	14	100
38	0	19	26	5	15	31	1	1	1	1	1	1	1	5.6	6	5	6	6	1	4	1	1	4666667	5	5	13	84.6
38	0	19	27	6	9	31	1	1	1	1	1	1	1	5.2	6	5	6	3	1	6	0	0	2	5	1	13	92.3
38	0	19	28	6	11	31	1	1	1	1	1	1	1	5.8	6	6	5	6	1	4	0	0	2333333	6	4	14	92.9
38	0	19	29	6	14	31	1.16667	2	1	1	1	1	1	4.4	5	5	5	1	1	3	0	0	5	5	1	15	100
38	0	19	30	6	16	31	1	1	1	1	1	1	1	4.6	5	5	5	3	1	4	1	1	5333333	5	4	14	100
38	0	19	31	6	22	31	1	1	1	1	1	1	1	4.4	5	4	5	3	3	6	1	1	1333333	3	6	14	92.9
39	0	47	1	1	8	33	2	2	2	2	2	2	2	4.8	5	5	5	4	3	4	0	0	3	6	1	8	100
39	0	47	2	1	12	33	1.5	2	2	2	1	1	1	5.2	5	4	6	6	3	3	1	0	3	5	4	8	100
39	0	47	3	1	16	33	1.5	2	2	2	1	1	1	4.6	5	5	4	4	2	4	1	0	3666667	5	6	8	100
39	0	47	4	1	20	33	1.33333	2	1	2	1	1	1	5.2	5	4	6	6	2	4	1	0	1666667	6		9	100
39	0	47	5	1	20	33	1.5	2	1	2	2	1	1	4.6	4	4	6	4	2	3	1	1	2333333	4	4	8	100
39	0	47	6	2	7	33	2.5	5	2	4	2	1	1	4.6	4	4	5	4	2	6	1	0	3666667	4	2	9	100
39	0	47	7	2	12	33	1	1	1	1	1	1	1	5.4	5	5	6	5	2	2	0	0	1666667	6	6	9	100
39	0	47	8	2	15	33	1.5	2	2	1	1	2	1	6	6	6	6	6	3	4	1	0	3333333	5	5	9	100
39	0	47	9	2	17	33	1	1	1	1	1	1	1	6	6	6	6	6	2	2	1	0	3	6	4	9	100
39	0	47	10	2	19	33	1	1	1	1	1	1	1	6	6	6	6	6	2	3	1	1	1	6	4	10	100
39	0	47	11	2	20	33	1	1	1	1	1	1	1	5.6	6	6	5	5	2	2	1	0	1333333	6		10	100
39	0	47	12	2	20	33	2.16667	1	2	1	7	1	1	5.4	6	6	7	1	1	2	1	1	3	7	2	9	100
39	0	47	13	3	9	33	1.16667	1	2	1	1	1	1	6	6	6	6	6	2	3	1	0	1333333	6	3	9	100
39	0	47	14	3	12	33	1	1	1	1	1	1	1	6	6	6	6	6	1	1	1	0	2	6	4	9	100
39	0	47	15	3	14	33	1	1	1	1	1	1	1	5.8	6	6	6	5	3	1	1	0	1666667	5	2	10	100
39	0	47	16	3	15	33	1.16667	1	1	2	1	1	1	5.6	6	5	6	5	2	1	1	0	1666667	6	2	9	100
39	0	47	17	3	17	33	1.16667	1	1	2	1	1	1	5.4	6	6	5	5	5	1	1	0	3333333	6	6	8	100
39	0	47	18	3	20	33	1.16667	1	1	2	1	1	1	4.8	5	5	5	4	2	1	1	0	1333333	5	5	11	100
39	0	47	19	3	20	33	1	1	1	1	1	1	1	5.8	6	6	6	5	2	1	1	0	1	6	6	9	100
39	0	47	20	4	12	33	1.66667	1	1	5	1	1	1	3.2	5	5	3	2	4	1	1	1	4333333	7	5	9	100
39	0	47	21	4	13	33	1.5	1	1	4	1	1	1	4.2	5	5	5	4	3	1	1	1	4333333	7	4	9	100
39	0	47	22	4	16	33	1.33333	1	2	2	1	1	1	4.6	5	5	5	5	4	1	1	0	3333333	5	3	10	100
39	0	47	23	4	17	33	1	1	1	1	1	1	1	4.8	5	4	5	5	1	1	1	0	1	6	2	9	100
39	0	47	24	4	19	33	1	1	1	1	1	1	1	5.8	6	5	6	6	2	1	1	0	1	7	1	8	100
39	0	47	25	4	20	33	1	1	1	1	1	1	1	5.6	6	5	6	5	2	1	1	0	1	6	1	12	100
39	0	47	26	5	16	33	1.16667	1	2	1	1	1	1	5.6	6	6	6	5	2	1	1	1	3	6	2	10	100
39	0	47	27	5	18	33	1	1	1	1	1	1	1	5.8	6	6	6	5	2	1	1	0	1	6	6	8	87.5
39	0	47	28	5	19	33	1	1	1	1	1	1	1	5.6	6	6	5	5	2	1	0	0	1333333	6	1	10	100
39	0	47	29	6	8	33	1	1	1	1	1	1	1	5.4	6	6	5	5	2	2	1	1	3333333	6	4	10	90
39	0	47	30	6	15	33	1	1	1	1	1	1	1	5.4	6	6	5	5	2	1	0	0	3333333	6	2	10	100
39	0	47	31	6	18	33	1	1	1	1	1	1	1	5.4	6	5	5	5	1	1	1	0	2	2	4	10	100
39	0	47	32	6	20	33	1	1	1	1	1	1	1	5.2	6	5	5	5	2	1	1	0	2	6	1	10	90
39	0	47	33	6	21	33	1	1	1	1	1	1	1	5.2	6	5	5	5	2	1	1	0	1666667	6	1	11	100
40	0	51	1	1	7	38	2.83333	5	3	3	2	2	2	4.2	4	3	5	5	5	6	1	1	3	4	5	10	90
40	0	51	2	1	9	38	2	2	2	2	2	2	2	4.6	5	4	5	5	4	4	1	1	2333333	5	2	11	100
40	0	51	3	1	12	38	2	2	2	2	2	2	2	4.8	5	5	5	5	3	4	1	1	2	4	1	11	100
40	0	51	4	1	13	38	2	2	2	2	2	2	2	4.8	5	5	5	5	4	5	0	1	1666667	5	2	10	90
40	0	51	5	1	16	38	2	2	2	2	2	2	2	5	5	5	5	5	4	5	0	1	1333333	5	5	11	90.9
40	0	51	6	1	18	38	2	2	2	2	2	2	2	5	5	5	5	5	4	4	0	0	2	5	2	11	100
40	0	51	7	1	20	38	2	2	2	2	2	2	2	5	5	5	5	5	4	4	0	0	3	6	3	11	100
40	0	51	8	1	22	38	2	2	2	2	2	2	2	4.6	5	4	5	4	4	4	0	0	2333333	5	2	10	100
40	0	51	9	2	7	38	2	2	2	2	2	2	2	5.4	5	5	6	6	4	5	1	1	1666667	5	2	11	100
40	0	51	10	2	11	38	2	2	2	2	2	2	2	5.6	5	6	6	6	4	5	1	1	2	4	2	12	100
40	0	51	11	2	12	38	2	2	2	2	2	2	2	5.6	6	5	6	6	4	5	1	1	1666667	4	2	10	100
40	0	51	12	2	14	38	2	2	2	2	2	2	2	5	5	5	5	5	4	5	1	1	2333333	4	2	12	100
40	0	51	13	2	16	38	2	2	2	2	2	2	2	5.4	5	5	6	6	3	4	1	1	2	5	2	12	100
40	0	51	14	2	18	38	2	2	2	2	2	2	2	5.6	6	6	6	5	4	4	0	0	2333333	5	2	12	100
40	0	51	15	2	20	38	2	2	2	2	2	2	2	5	5	5	5	5	4	4	0	0	2333333	4		10	100
40	0	51	16	3	7	38	2	2	2	2	2	2	2	5	5	5	5	5	4	5	1	1	1666667	5	2	11	90.9
40	0	51	17	3	8	38	2	2	2	2	2	2	2	5.4	5	5	6	6	3	5	1	1	2	5	2	11	90.9
40	0	51	18	3	10	38	2.16667	2	2	3	2	2	2	5.4	5	5	6	6	3	5	1	1	2	5	4	12	100
40	0	51	19	3	12	38	2	2	2	2	2	2	2	5.6	6	6	6	5	3	4	1	1	2	5	2	12	100
40	0	51	20	3	13	38	2	2	2	2	2	2	2	5.4	6	5	5	6	3	5	1	1	2333333	5	2	11	100
40	0	51	21	3	19	38	2	2	2	2	2	2	2	5	5	5	5	5	3	5	0	0	2	5	3	11	100
40	0	51	22	3	21	38	2	2	2	2	2	2	2	5.4	5	5	6	5	3	5	0	0	2333333	5	2	11	100
40	0	51	23	4	7	38	2	2	2	2	2	2	2	5	5	5	5	5	3	5	1	1	1666667	5	2	12	100
40	0	51	24	4	9	38	2	2	2	2	2	2	2	5.8	6	6	6	6	3	5	1	1	2	6	2	12	100
40	0	51	25	4	14	38	2	2	2	2	2	2	2	5.6	6	5	6	6	3	5	1	1	1666667	5	2	12	100
40	0	51	26	4	16	38	2	2	2	2	2	2	2	5.8	6	6	6	6	3	5	1	1	2	5	2	12	100
40	0	51	27	4	18	38	2	2	2	2	2	2	2	5.6	6	5	6	5	3	5	0	0	2	5		12	100
40	0	51	28	4	18	38	2	2	2	2	2	2	2	5.2	5	5	5	6	3	4	1	1	2	5	2	12	100
40	0	51	29	4	22	38	2	2	2	2	2	2	2	4.6	5	4	5	4	3	5	0	0	2	5
40	0	51	30	5	11	38	2.33333	2	2	4	2	2	2	6	6	6	6	6	3	4	0	1	1666667	6	3	10	100
40	0	51	31	5	16	38	2	2	2	2	2	2	2	5.2	6	5	5	5	3	4	1	1	2333333	4	6	8	100
40	0	51	32	5	22	38	2	2	2	2	2	2	2	5.4	6	5	5	5	3	5	1	0	2	5	2	11	100
40	0	51	33	6	10	38	2	2	2	2	2	2	2	5	5	5	5	5	3	5	0	0	2	5	2	11	100
40	0	51	34	6	13	38	2	2	2	2	2	2	2	6	6	6	6	6	3	4	1	0	2	6	2	12	100
40	0	51	35	6	15	38	1.66667	2	2	1	2	2	1	5.6	6	6	6	5	3	5	0	0	2666667	5	2	12	100
40	0	51	36	6	18	38	2	2	2	2	2	2	2	5.8	6	6	6	5	3	5	0	0	1666667	5	2	13	100
40	0	51	37	6	20	38	2	2	2	2	2	2	2	5	5	5	5	5	3	5	0	0	2	5	2	11	90.9
40	0	51	38	6	21	38	2	2	2	2	2	2	2	5.2	6	5	5	5	3	5	0	0	3	5	2	11	100
